18 **ABSTRACT**

19 ATRX is a tumor suppressor that has been associated with protection from DNA replication  
20 stress, purportedly through resolution of difficult-to-replicate G-quadruplex (G4) DNA structures.  
21 While several studies demonstrate that loss of ATRX sensitizes cells to chemical stabilizers of  
22 G4 structures, the molecular function of ATRX at G4 regions during replication remains  
23 unknown. Here, we demonstrate that ATRX associates with the MCM replication complex and  
24 that loss of ATRX leads to G4 structure accumulation at newly synthesized DNA. We show that  
25 both the helicase domain of ATRX and its H3.3 chaperone function are required to protect cells  
26 from G4-induced replicative stress. Furthermore, these activities are upstream of  
27 heterochromatin formation mediated by the histone methyltransferase, ESET, which is the  
28 critical molecular event that protects cells from G4-mediated stress. In support, tumors carrying  
29 mutations in either ATRX or ESET show increased mutation burden at G4-enriched DNA  
30 sequences. Overall, our study provides new insights into mechanisms by which ATRX promotes  
31 genome stability with important implications for understanding impacts of its loss on human  
32 disease.

33

## 34 INTRODUCTION

35 ATRX is a chromatin remodeling protein of the SWI/SNF family, mutations in which cause alpha  
36 thalassemia X-linked (ATRXL) intellectual disability syndrome and are highly associated with a  
37 number of cancers characterized by alternative lengthening of telomeres (ALT)<sup>1</sup>. ATRX localizes  
38 to heterochromatic repetitive regions, including telomeres, pericentric repeats, rDNA repeats,  
39 and endogenous retroviral elements (ERVs)<sup>2-8</sup>. ATRX functions with the histone chaperone  
40 DAXX to facilitate deposition of the histone variant H3.3 at these regions<sup>9</sup>, resulting in a unique  
41 form of heterochromatin characterized by both trimethylation of histone H3 at lysine 9  
42 (H3K9me3) and H3.3<sup>10,11</sup>. Loss of any one of ATRX/DAXX/H3.3 is correlated with loss of  
43 H3K9me3 heterochromatin at repetitive regions<sup>3,11,12</sup>. Loss of ATRX has been implicated in  
44 replication stress, DNA damage, and DNA repair failures that drive genome instability, and  
45 aberrant homologous recombination<sup>6,8,12-18</sup>. However, the mechanism underlying this  
46 dysfunction is unclear.

47  
48 ATRX is hypothesized to prevent replication stress by resolving stable non-B form DNA  
49 structures called G-quadruplexes (G4) ahead of the replication fork. These structures are  
50 thought to form when double-stranded DNA is dissociated in GC-rich regions during replication  
51 and transcription<sup>19,20</sup>. G4 structures are generally considered to block the progression of DNA  
52 replication forks, ultimately leading to replication fork collapse<sup>21</sup>. A number of helicases,  
53 including BLM, WRN, and ATRX, are proposed to protect the genome by unfolding G4  
54 structures and preventing them from causing DNA breaks<sup>22-24</sup>. Genome-wide, ATRX is enriched  
55 at GC-rich sequences with the propensity for forming G4 structures<sup>2</sup> although ATRX is unable to  
56 unfold G4 structures *in vitro*<sup>14</sup>. However, exogenous expression of ATRX in cells lacking ATRX  
57 has been shown to reduce levels of G4 structures<sup>25</sup> and, further, ATRX has been shown to  
58 protect cells from replication stresses induced by chemical stabilizers of G4 structures<sup>15,25,26</sup>.  
59 Despite these striking observations, direct links between ATRX, G4 structures, and the  
60 molecular mechanisms by which ATRX functions at these regions have not been reported.

61  
62 In this study we explored the mechanisms underlying ATRX function at G4 structures. We  
63 validate previous observations that ATRX is bound at G4-containing regions and further  
64 demonstrate that ATRX interacts with G4 structures in cells. In addition, we find that ATRX  
65 interacts with the MCM helicase and that G4 DNA accumulates at newly synthesized DNA in the  
66 absence of ATRX. Genomic analysis suggests that loss of ATRX results in G4 accumulation  
67 primarily at intergenic and repetitive regions. We show that ATRX requires both its helicase and  
68 H3.3 chaperone activity to attenuate G4 stabilization-induced replication stress. Interestingly, we  
69 find that ATRX maintains a closed chromatin state at G4-containing regions and that this  
70 function is mediated by DAXX-dependent deposition of H3.3. These activities are upstream of  
71 heterochromatin formation, which is ultimately required for protection from G4-mediated stress.  
72 Finally, we show that pan-cancer patient samples bearing mutations in either ATRX or ESET  
73 had a significantly increased mutation burden at G4-containing DNA. Overall, our findings  
74 support the conclusion that ATRX protects genomic integrity at G4-containing regions by  
75 maintaining these regions in a closed heterochromatic state.

76  
77

## 78 RESULTS

### 79 ATRX associates with G4 structures in vivo

80 It has been reported that ATRX binds to repetitive regions of the genome such as telomeres and  
81 pericentric regions<sup>2</sup>, but also to promoters<sup>7,8</sup>. To confirm genomic ATRX enrichment, we  
82 performed ChIP-seq using a GFP antibody and mouse embryonic stem cells (mESCs) in which  
83 the endogenous ATRX locus was tagged<sup>27</sup> with a C-terminal GFP (**Fig. 1a** and **Supplementary**  
84 **Fig. 1a, 1b**). ATRX-enriched regions were often enriched with the histone variant, H3.3, and  
85 with H3K9me3, consistent with previous reports of this unique class of heterochromatin in  
86 ESCs<sup>11,28</sup> (**Fig. 1a**). In agreement with published data<sup>2,8</sup>, we found ATRX enriched mainly at  
87 repeat regions in ESCs, including telomere and pericentric repeats that are predicted to form G-  
88 quadruplex structures (G4) under physiological conditions<sup>29,30</sup> (**Supplementary Fig. 1c-1e**). To  
89 further validate these results, we performed ChIP-seq using an ATRX antibody in both WT and  
90 ATRX knockout (ATRX KO) ESCs (**Fig. 1a** and **Supplementary Fig. 1f, 1g**). For further  
91 analysis, we considered our ATRX-GFP and WT ATRX ChIP-seq data sets as replicates.  
92 Overall, we identified 435 regions of ATRX enrichment at uniquely mappable regions of the  
93 genome. These regions contained 3.6x more (30 standard deviations more than expected by  
94 chance) G4 consensus motifs (G<sub>3</sub>N<sub>1-12</sub>G<sub>3</sub>N<sub>1-12</sub>G<sub>3</sub>N<sub>1-12</sub>G<sub>3</sub>)<sup>31</sup> compared to randomly selected  
95 regions that were comparable in size and number, over 100 simulations (**Supplementary Fig.**  
96 **1h**). Nearly 40% (169/435) of ATRX-enriched regions contained a G4 consensus motif (**Fig. 1b**  
97 and **Supplementary Table 1**), and further, de novo motif prediction identified GC-rich motifs as  
98 being overrepresented in these regions (**Supplementary Fig. 1i**). G4-containing regions  
99 showed considerable ATRX enrichment compared to regions identified as enriched with ATRX  
100 but without a G4 consensus motif (**Fig. 1c** and **Supplementary Fig. 1j, 1k**).

101  
102 Based on the enrichment of the G4 consensus motif at sites of ATRX enrichment, we next  
103 asked whether we could observe ATRX interaction with G4 structures in cells. Since ATRX is  
104 reported to be recruited to telomeres during late S and associated with their replication<sup>13</sup>, we  
105 wanted to assess ATRX-G4 interaction throughout the cell cycle. We synchronized cells in  
106 mitosis using a thymidine-nocodazole treatment and then released cells with EdU to visualize  
107 DNA replication (**Fig. 1d** and **Supplementary Fig. 2a, 2b**). We then performed a proximity  
108 ligation assay (PLA) using antibodies that recognize 1) ATRX and 2) G4 structures (e.g., the  
109 BG4 antibody)<sup>32</sup> in both WT and ATRX KO mESCs. Interestingly, we observed ATRX and G4  
110 association in cells that had not yet begun replication (**Fig. 1e**, note cells in G1 evidenced by  
111 lack of EdU staining). Association was highest in G1 phase and decreased slightly in early S  
112 phase (**Fig. 1f**). We did not observe an appreciable level of ATRX-G4 association on mitotic  
113 chromosomes (**Supplementary Fig. 2c**). Further, we did not observe ATRX-G4 foci in single  
114 antibody controls or ATRX KO mESCs (**Supplementary Fig. 3a**) or G4 association with an  
115 independent chromatin-associated protein, HIRA (**Supplementary Fig. 3b, 3c**), demonstrating  
116 the specificity of the interaction. Overall, these data strongly link ATRX to regions containing G4  
117 consensus motifs and G4 structures.

### 118 119 ATRX associates with the MCM DNA helicases

120 Despite increasing evidence that ATRX plays a replication-associated role in resolving G4  
121 structures<sup>14-16</sup>, mechanisms that recruit ATRX to these structures remain poorly understood. We

122 therefore used immunoprecipitation-coupled to mass spectrometry (IP-MS) to identify potential  
123 factors that interact with ATRX that may allow insight into its localization and function. We  
124 identified many proteins related to DNA replication and transcription that were enriched by  
125 ATRX pulldown in wild-type cells compared to ATRX KO cells and immunoprecipitation using a  
126 control IgG antibody (**Fig. 2a** and **Supplementary Fig. 4a, 4b**). These include previously  
127 identified ATRX-interacting proteins such as Mre11<sup>14</sup>, a member of the MRN complex involved  
128 in DNA damage repair (**Supplementary Table 2**). Further, we identified a number of proteins  
129 that have been genetically linked to G4 structures<sup>33</sup>, including DDX10 and SPEN  
130 (**Supplementary Table 2**). We also identified members of the MiniChromosome Maintenance  
131 (MCM) complex (e.g., MCM2, MCM4, MCM6, and MCM7), a DNA helicase essential for  
132 replication<sup>34</sup>, as novel ATRX-interacting proteins (**Fig. 2a**).

133  
134 We first validated interaction of ATRX and MCM proteins using co-immunoprecipitation (**Fig. 2b**  
135 and **Supplementary Fig. 4c**). ATRX specifically pulled down MCM2/4/6/7 subcomplexes<sup>34,35</sup>  
136 (**Fig 2a, b** and **Supplementary Fig. 4c**). Because the enrichment of MCM by ATRX  
137 immunoprecipitation was relatively low, and to determine whether ATRX-MCM interaction  
138 occurred in cells, we performed proximity ligation using ATRX and MCM antibodies. We  
139 observed ATRX interaction with MCM2/3/4/6, with no PLA signal observed in ATRX KO ESCs  
140 (**Supplementary Fig. 4d-4k**), suggesting that ATRX is in proximity of a complete MCM  
141 complex. The majority of EdU labeling is not at sites of ATRX-MCM interaction, in line with  
142 ATRX being bound at only a small number of loci genome-wide (**Fig. 1b**).

143  
144 ATRX contains an ATPase/helicase domain that is often mutated in both ATRX syndrome and  
145 in cancers<sup>36,37</sup>. Another well-characterized function of ATRX is its involvement in H3.3  
146 deposition at telomeres and other types of heterochromatin through its interactions with the  
147 H3.3 chaperone protein, DAXX<sup>9</sup>. Hypothetically, the ATRX helicase domain could unwind G4  
148 structures which could be resolved by H3.3 deposition and nucleosome formation. We therefore  
149 asked whether interaction with MCM requires these two functional elements of ATRX. We first  
150 performed ATRX immunoprecipitation and ATRX-Mcm6 PLA in DAXX knockout (DAXX KO)  
151 ESCs (**Supplementary Fig. 1f**). Interestingly, we found that ATRX maintains association with  
152 Mcm6 in the absence of DAXX using both IP-WB and PLA (**Supplementary Fig. 5a-5c**). In  
153 support, the ATRX-Mcm6 association was maintained in ATRX KO cells expressing an ATRX  
154 mutant that attenuates DAXX binding (ATRX L1238A)<sup>38</sup> (**Fig. 2c** and **Supplementary Fig. 5d-**  
155 **5f**). The ATRX/DAXX chaperone complex shares its substrate H3.3 with the HIRA complex,  
156 which deposits H3.3 at regulatory elements and genes<sup>39</sup>. We found that HIRA did not co-  
157 immunoprecipitate MCM6 in wild-type cells (**Supplementary Fig. 5g**), and that ATRX  
158 interaction with Mcm6 was maintained in the absence of HIRA (**Supplementary Fig. 5a, 5h**),  
159 suggesting the specificity of the ATRX-MCM interaction. Finally, we expressed an ATRX  
160 helicase mutant (ATRX K1562R) in ATRX KO mESCs. Using IP-WB and PLA, we found that the  
161 ATRX helicase mutant maintains association with Mcm6 (**Fig. 2c** and **Supplementary Fig. 5d-**  
162 **5f**). Overall, these results suggest that ATRX helicase and chaperone activity is decoupled from  
163 mechanisms dictating its localization on chromatin.

164

165 Recent reports demonstrate that Mcm2 itself contains chaperone function for H3-H4 dimers<sup>40</sup>,  
166 raising the intriguing possibility that the MCM-ATRAX association is bridged by H3.3 itself. To test  
167 the requirement of H3.3 for ATRAX-Mcm6 interaction, we immunoprecipitated ATRAX from H3.3  
168 knockout cells (**Supplementary Fig. 6a**). We found that loss of H3.3 resulted in reduced  
169 association between ATRAX and Mcm6 (**Fig. 2d** and **Supplementary Fig. 6b**). ATRAX-Mcm6  
170 association could be restored by exogenous expression of H3.3 but not by an H3.3 mutant  
171 previously shown to inhibit stable formation of nucleosomes (H3.3 L126A I130A)<sup>41</sup> (**Fig. 2d** and  
172 **Supplementary Fig. 6c**), demonstrating the importance of H3.3 deposition for maintaining the  
173 ATRAX-MCM interaction.

174

### 175 **Loss of ATRAX leads to accumulation of G4 structures at sites of DNA synthesis**

176 Our identification of an association between ATRAX and the MCM complex supports a body of  
177 existing literature demonstrating that ATRAX plays a role in DNA replication<sup>14–16,26,42</sup>. While many  
178 studies hypothesize that ATRAX replicative stress is due to the inability to resolve G4  
179 structures<sup>2,14,15,25,26</sup>, the direct effect of loss of ATRAX on G4 structures at replicating DNA has not  
180 been assessed. To test whether the persistence of G4 structures at newly synthesized DNA is  
181 affected by loss of ATRAX, we used in situ analysis of protein interaction at DNA replication forks,  
182 or SIRF<sup>43</sup>. Briefly, mitotic cells were released from synchronization and labeled with EdU for a  
183 short period of time prior to cell fixation at early S phase. EdU incorporation into newly  
184 synthesized DNA was detected using click chemistry for biotin labeling. EdU and G4 interaction  
185 was then determined by proximity ligation. We found that normalized EdU-G4 signals were  
186 increased in ATRAX KO and DAXX KO ESCs (**Fig. 3a** and **3b**). This effect could be rescued by  
187 expression of wild-type ATRAX in ATRAX KO ESCs, whereas we find that both the helicase  
188 activity of ATRAX and its ability to interact with DAXX are important to reduce G4-EdU  
189 persistence (**Supplementary Fig. 7**).

190

191 While imaging experiments allow powerful observation of G4 activity at the single-cell level, they  
192 fail to provide genomic identification of specific G4-containing regions that may be affected by  
193 loss of ATRAX. To experimentally identify G4 regions in ESCs and determine the effect of ATRAX  
194 loss on these regions, we performed CUT&Tag using the BG4 antibody (**Fig. 3c**). We identified  
195 2,320 regions as experimentally enriched with G4 structures in wild-type cells (**Fig. 3d**). These  
196 regions contained 5.3x more G4 motifs compared to randomly selected regions, with 58%  
197 (1,356/2,230) containing a predicted G4 motif (**Supplementary Fig. 8a** and **8b**). Generally, G4-  
198 containing regions are localized to promoters in wild-type ESCs - of note, a region that we do  
199 not strongly associate with ATRAX binding (**Fig. 3e**, also see **Supplementary Fig. 1c**). We next  
200 wanted to determine the effect of loss of ATRAX on genomic G4 accumulation. Interestingly, we  
201 observe 6,301 novel G4 sites in ATRAX KO ESCs that are not observed in wild-type ESCs (**Fig.**  
202 **3d** and **Supplementary Fig. 8c** and **8d**). These regions are annotated predominantly as  
203 introns, intergenic regions, LINEs, and LTRs (**Fig. 3f**), suggesting that ATRAX is mainly  
204 responsible for resolving G4 structures in these regions.

205

206 While the G4-EdU signal observed in our PLA assay could be due to replication, we cannot rule  
207 out that this signal results from nucleotide incorporation due to DNA damage repair. To try to  
208 distinguish between the two, we used two sequencing techniques - EdU-seq, in which we

209 sequenced nascently synthesized DNA after a short pulse of EdU (which cannot distinguish  
210 between repair and replication), and published SNS-seq data<sup>44</sup>, in which RNA primers  
211 associated with DNA replication initiation are sequenced (mapping putative origins). We found  
212 several regions where mapped origins<sup>44</sup> were identified upstream or downstream of ATRX-  
213 enriched G4 regions, and further, that treatment with the G4 stabilizer, PhenDC3, resulted in  
214 increased detection of origin activity at or near ATRX-bound G4 regions compared with  
215 untreated cells (**Supplementary Fig. 9a-d**). These regions also showed increased EdU-seq  
216 signal in the absence of either ATRX or DAXX (**Supplementary Fig. 9a, 9e-f**). However, when  
217 we consider G4-enriched regions that are identified experimentally in the absence of ATRX, we  
218 find that these regions show increased EdU-seq signal in the absence of ATRX or DAXX with  
219 no evident increase in origin usage after PhenDC3 treatment<sup>44</sup> (**Fig. 3g** and **Supplementary**  
220 **Fig. 9g**). Overall, while a subset of ATRX-dependent G4 regions may stimulate replication,  
221 these data and the literature are consistent with a model in which ATRX KO cells experience  
222 increased replicative stress and DNA damage due to G4 persistence.

223

### 224 **ATRX requires its helicase activity and interaction with DAXX to protect from G4-induced** 225 **stress**

226 Previous studies have linked loss of ATRX to increased sensitivity to chemical agents that  
227 stabilize G4 structures such as pyridostatin (PDS) and CX-3543, presumably due to G4  
228 persistence in cells<sup>25,26</sup>. Our results suggest that both ATRX and DAXX are required to reduce  
229 G4 levels in cells. We therefore asked whether loss of DAXX would phenocopy loss of ATRX  
230 with respect to PDS sensitivity. We treated an isogenic panel of wild-type, ATRX KO, and DAXX  
231 KO ESCs with increasing concentrations of PDS. Analysis of cell viability demonstrated that  
232 both DAXX KO and ATRX KO resulted in increased sensitivity to PDS (**Fig. 4a**). Importantly,  
233 exogenous expression of DAXX in DAXX KO ESCs, and likewise, exogenous expression of  
234 ATRX in ATRX KO ESCs, attenuated sensitivity to PDS (**Fig. 4b** and **Supplementary Fig. 10a**  
235 and **10b**). To assess whether ATRX interaction with DAXX was necessary to relieve PDS-  
236 induced stress, we expressed the ATRX DAXX-binding mutant (ATRX L1238A) in ATRX KO  
237 ESCs. Strikingly, this mutation is unable to relieve PDS sensitivity (**Fig. 4b**), suggesting that  
238 ATRX interaction with DAXX is required for this function. Further, mutations to ATRX that  
239 disrupt its helicase activity (ATRX K1562R, K1612N)<sup>45</sup> remain sensitive to PDS (**Fig. 4b**).

240

241 The requirement for an ATRX/DAXX complex suggests that H3.3 deposition may be important  
242 to protect from PDS sensitivity. In agreement, we found that loss of either ATRX or DAXX  
243 results in reduced H3.3 incorporation at sites of ATRX enrichment containing G4 consensus  
244 motifs (**Supplementary Fig. 10c** and **10d**). Further, H3.3 KO ESCs showed increased  
245 sensitivity to PDS compared to wild-type ESCs (**Fig. 4c** and **Supplementary Fig. 10e**).  
246 Sensitivity could be rescued by exogenous expression of H3.3 but not by the H3.3 deposition  
247 mutant (H3.3 L126A I130A) (**Fig. 4c**). Importantly, we find that HIRA KO ESCs are highly  
248 comparable with wild-type ESCs with respect to PDS sensitivity (**Fig. 4a**). Overall, these data  
249 suggest that both ATRX helicase activity and ATRX/DAXX-mediated H3.3 deposition, but not  
250 HIRA-mediated H3.3 deposition, are required for protection from G4 stabilizers.

251

252 **ATRX maintains closed chromatin states upstream of heterochromatin formation to**  
253 **protect cells from G4-mediated stress**

254 We next wanted to understand how ATRX protects cells from G4-mediated stress. If ATRX is  
255 involved in nucleosome assembly at G4 DNA, it follows that these regions should be more open  
256 in the absence of ATRX. In support, recent studies demonstrate that loss of ATRX induces  
257 chromatin de-compaction at telomeres and repetitive elements<sup>3,10,12,46</sup>. To explore whether  
258 ATRX deficiency altered chromatin accessibility at G4 regions, we performed ATAC-seq in wild-  
259 type and ATRX KO ESCs. Strikingly, we found that ATRX depletion elevated chromatin  
260 accessibility at ATRX-enriched regions containing G4 consensus motifs while paradoxically  
261 resulting in reduced H3.3 deposition, a histone variant long associated with open chromatin  
262 (**Fig. 5a, 5b** and **Supplementary Fig. 10c**). Analogous results were observed in DAXX KO  
263 ESCs and H3.3 KO ESCs (**Fig. 5c** and **5d** and **Supplementary Fig. 10d**). Further, we find that  
264 expression of exogenous ATRX in ATRX KO ESCs rescues this effect, while neither the ATRX  
265 helicase mutant nor the DAXX-interaction mutant in ATRX KO ESCs results in reduced  
266 accessibility at these regions (**Fig. 5e**). Maintaining these regions in a closed state requires  
267 H3.3 deposition, as only expression of wild-type H3.3, and not that of the deposition mutant,  
268 was able to rescue this effect in H3.3 KO ESCs (**Fig. 5f**). Importantly, chromatin accessibility at  
269 G4 regions was not altered in HIRA KO ESCs (**Supplementary Fig. 11a**). Additionally,  
270 increased chromatin accessibility did not result in concomitant increases in histone acetylation  
271 or transcription from nearby genes (**Supplementary Fig. 11b-f**).

272  
273 Previous studies have shown that ATRX facilitates the establishment and maintenance of a  
274 subset of H3.3- and H3K9me3-marked heterochromatin<sup>3,5,11</sup>. We therefore asked how loss of  
275 the ATRX/DAXX/H3.3 complex would influence the chromatin state at ATRX-enriched G4  
276 regions. First, we re-analyzed published H3K9me3 ChIP-seq data for ATRX KO, DAXX KO and  
277 H3.3 KO ESCs<sup>11</sup>. We found that H3K9me3 enrichment at ATRX-bound G4 regions was reduced  
278 in ATRX KO, DAXX KO and H3.3 KO cells (**Fig. 6a-6d**). Further, we find that expression of  
279 exogenous ATRX in ATRX KO ESCs rescues this effect, while neither the ATRX helicase  
280 mutant nor the DAXX-interaction mutant in ATRX KO ESCs rescues heterochromatin formation  
281 at these regions (**Fig. 6e**). Maintaining these regions in a closed state requires H3.3 deposition,  
282 as only expression of wild-type H3.3, and not that of the deposition mutant, was able to rescue  
283 this effect in H3.3 KO ESCs (**Fig. 6f**). These data demonstrate that the ATRX/DAXX/H3.3  
284 pathway are key factors for H3K9me3 maintenance at G-quadruplex regions.

285  
286 Previous studies demonstrate that the histone methyltransferase ESET has a critical role in the  
287 establishment of H3K9me3 at H3.3-enriched repetitive elements<sup>11,47</sup>. Accordingly, H3K9me3  
288 enrichment on H3.3-containing nucleosomes at ATRX-bound G4 regions was reduced in the  
289 absence of ESET (**Fig. 7a, 7b** and **Supplementary Fig. 12a**). We next asked whether there  
290 exists a molecular hierarchy (ATRX helicase and histone chaperone activity vs ATRX promotion  
291 of heterochromatin formation) in protecting cells from G4-mediated stress. To this end, we used  
292 ESET conditional KO ESCs to determine the effect of loss of heterochromatin at G4 regions.  
293 First, we found that H3.3 deposition at ATRX-bound G4 regions is unaffected in the absence of  
294 ESET (**Fig. 7c**), even though heterochromatin at these regions is reduced (**Supplementary Fig.**  
295 **12b and 12c**). Interestingly, ATRX-bound G4 regions become more open in the absence of



296 ESET (**Fig. 7d**). Further, like ATRX/DAXX/H3.3 KO ESCs, ESET KO ESCs are sensitive to  
297 PDS treatment (**Fig. 7e**). Taken together, these results suggest that heterochromatin formation  
298 is the ultimate molecular event that protects cells from G4-mediated stress.

299  
300 It has been shown that G4 structures are correlated with increased DNA polymerization error  
301 rates<sup>48</sup>, and that G4 structures harbor a high incidence of disease-causing point mutations and  
302 indels<sup>49–51</sup>. Further, studies demonstrate that ATRX mutant tumors carry a high mutation rate  
303 either at the single-nucleotide variant level or copy number alterations<sup>25,52</sup>. Given these  
304 observations, we asked whether regions identified as enriched with G4 structures had increased  
305 mutation burden in human cancers. Strikingly, we found that patient samples containing either  
306 ATRX or ESET mutations contained a significantly higher number of substitutions at G4-  
307 containing DNA compared to an iteratively sampled random selection of donors (**Fig. 8a and**  
308 **8b**). These substitutions were more likely to involve mutation of G or C bases compared with A  
309 or T (**Fig. 8c and 8d**). Further, this trend was not observed from donors carrying mutations in  
310 oncogenes such as KRAS and IDH1 (**Supplementary Fig. 13**), lesions that we do not expect to  
311 impact G4 DNA regulation.

## 312 313 **DISCUSSION**

314 Previous studies have linked ATRX to replication fork progression, presumably through  
315 resolution of G4 structures<sup>2,14,15,25,26</sup>. Here, we provide a direct link between ATRX and the  
316 replication machinery. We find that ATRX interacts with the MCM helicase and that G4  
317 structures show increased coincidence with newly synthesized DNA in the absence of ATRX.  
318 We find that ATRX maintains G4-containing regions in a closed heterochromatic state through  
319 DAXX-mediated deposition of the histone variant H3.3, and that establishment of  
320 heterochromatin is the critical molecular event protecting cells from G4-mediated stress (**Fig. 9**).

321  
322 Previous studies using immunofluorescence have not observed colocalization of ATRX and G4  
323 structures in cells, presumably because ATRX activity results in the resolution of G4s<sup>25</sup>. One  
324 advantage of PLA is the ability to capture these brief interactions. Interestingly, we find that  
325 ATRX colocalizes with G4 structures throughout both G1 and S phase. This result suggests that  
326 ATRX recruitment to these regions is not a result of replication fork stalling, and that it is instead  
327 a normal feature of ATRX function. While we observe co-localization between ATRX and the  
328 MCM complex, the exact molecular nature of this interaction remains to be seen and is unlikely  
329 to drive ATRX recruitment to chromatin, given that MCM-bound regions vastly outnumber  
330 ATRX-bound regions. To date, binding of G4 structures has not been attributed to a particular  
331 region of ATRX. ATRX-bound regions thought to contain G4 structures, such as telomeres, are  
332 generally enriched with H3K9me3, and ATRX has been shown to bind H3K9me3 through its  
333 ADD domain<sup>53,54</sup>. However, ESCs contain many regions of H3K9me3 heterochromatin that are  
334 not bound by ATRX or enriched with H3.3<sup>11</sup>, so this cannot be the sole determinant of  
335 recruitment and instead may stabilize ATRX association with these regions. Interestingly, we do  
336 not observe appreciable ATRX enrichment at the thousands of new G4 structures that we  
337 identify genomically in the absence of ATRX, in support of the hypothesis that ATRX recruitment  
338 to these regions may be transitory and that ATRX is released once the G4 has been resolved. It  
339 is also formally possible that ATRX may in some way regulate other helicases responsible for

340 regulating G4 structures in cells. Detailed molecular understanding of the kinetics of ATRX  
341 recruitment and function at G4 regions remains an important point of future study.

342  
343 Strikingly, we observe a dramatic increase in chromatin accessibility at ATRX-enriched G4  
344 regions in the absence of ATRX/DAXX/H3.3, accompanied by a loss of H3K9me3  
345 heterochromatin at these regions. These demonstrate that deposition of H3.3 plays a role in  
346 maintaining a closed chromatin state in these regions. This is a somewhat surprising  
347 observation given that many regions of H3.3 deposition experience high rates of nucleosome  
348 turnover<sup>55-57</sup>, and that in general, H3.3 is associated with open chromatin states<sup>58,59</sup>. These data  
349 do, however, support that keeping G4 regions heterochromatinized is likely a defining functional  
350 role of ATRX. Given the published literature<sup>3,12,46</sup>, and our results in this study, it is likely that  
351 ATRX protects cells from replicative stress by doing so. Additionally, we observe increased  
352 chromatin accessibility and decreased H3K9me3 heterochromatin at ATRX-enriched G4 regions  
353 in ATRX helicase mutant-expressing cells. Our data show an increase in G4 at EdU-  
354 synthesized DNA and G4-mediated replicative stress in helicase-mutant expressing cells, as  
355 well. Based on these observations, it is likely that ATRX unwinds G4 in cells. This is in contrast  
356 to a previous study showing that ATRX is not able to unwind G4 structures in vitro<sup>14</sup>. This could  
357 be due to lack of nearby chromatin on the G4 DNA in vitro or perhaps because ATRX has a  
358 preference for a specific fold of G4 structure. Additional experiments are needed to test whether  
359 chromatinized DNA or other varieties of G4 DNA structures are requirements for ATRX helicase  
360 activity.

361  
362 It is widely reported that ATRX mutation is strongly linked to human ALT cancers such as  
363 pancreatic neuroendocrine tumors and glioma<sup>39</sup>. Many works support the hypothesis that ATRX-  
364 deficient tumors show genome instability due dysregulation at specific repetitive DNA regions  
365 (e.g., telomere or ribosomal DNA)<sup>39</sup>. Our analysis of mutation at observed G4 regions in ATRX-  
366 deficient tumors are the first to show the direct link between ATRX mutation and G4 in tumor  
367 samples by whole genome analysis, with C/G to A/T mutation being common in ATRX-deficient  
368 tumors. This result is phenocopied in tumors containing mutation in ESET, supporting our model  
369 that heterochromatinization protects G4 DNA from replicative stress. In the future, it will be  
370 interesting to determine the molecular mechanism by which ATRX loss promotes substitutions  
371 at G4 regions through extensive biochemical and molecular biology approaches including  
372 careful analysis of the replication machinery and whole genome analysis in tumors.

373  
374 Overall, we conclude that ATRX/DAXX protects G4 regions by maintaining a heterochromatin  
375 state marked by both H3.3 deposition and reduced chromatin accessibility. These data provide  
376 new insights into molecular mechanisms by which this complex supports genome integrity with  
377 important implications for our understanding of human disease.

378  
379  
380  
381

## 382 **METHODS**

383 **Plasmids.** To tag the endogenous ATRX locus with GFP, pCAS9-mCherry empty, pCAS9-  
384 mCherry-Frame +1, and pCRISPaint-TagGFP2-PuroR plasmids were purchased from Addgene.  
385 To generate HA-tagged ATRX expression plasmid (PB-ATRX-HA-Neo), human ATRX cDNA  
386 were amplified from HeLa and assembled into PB-EF1 $\alpha$ -MCS-IRES-Neo vector (System  
387 Biosciences) by Gibson assembly. The ATRX sequence corresponded to isoform 2  
388 (NM\_138270.4) and was verified by standard Sanger sequencing. Site-directed mutagenesis  
389 was used to generate mutations in PB-ATRX-HA-Neo. The ATRX plasmids were propagated  
390 using ElectroMAX™ Stbl4™ Competent cells (Life Technologies). To generate Flag-tagged  
391 DAXX expression plasmid (pCDH-Flag-DAXX-Puro), Flag-tagged DAXX DNA were amplified  
392 from plasmid Flag-Daxx/pRK5 (Addgene) and assembled into pCDH-EF1 $\alpha$ -MCS-IRES-Puro  
393 vector (System Biosciences).

394 **Cell culture.** ESCs were cultured on gelatin-coated plates under standard conditions (KO-  
395 DMEM, 2 mM Glutamax, 15% ES grade fetal bovine serum, 0.1 mM 2-mercaptoethanol, 1x  
396 Pen/Strep, 1x NEAA and leukemia inhibitory factor) at 37°C with 5% CO<sub>2</sub>. ATRX KO, DAXX KO,  
397 HIRA KO (HIRA KO2), H3.3 KO and ESET cKO cells have been described previously<sup>3,47,60,61</sup>.  
398 ESET deletion was induced by 1  $\mu$ M 4-OHT (Sigma) treatment in ESET cKO cells. HeLa cells  
399 were purchased from ATCC and cultured in medium (DMEM, 10% fetal bovine serum, 1x  
400 Pen/Strep and 2 mM Glutamax) at 37°C with 5% CO<sub>2</sub>. Cells were tested routinely for  
401 mycoplasma.

## 402 **Stable cell lines.**

403 *ATRX-GFP ESCs.* GFP-tagged ATRX ESCs were generated using CRISPR/Cas9-mediated  
404 homology directed repair<sup>27</sup>. 1 x 10<sup>6</sup> ESCs were mixed with 2.5  $\mu$ g target selector plasmid  
405 (pCAS9-mCherry harboring ATRX guide RNAs (AAATCACATTGATTTCCCTG)), 2.5  $\mu$ g frame  
406 selector plasmid (pCAS9-mCherry-Frame +1) and 5  $\mu$ g donor plasmid (pCRISPaint-TagGFP2-  
407 PuroR). Electroporation was performed using the Neon transfection system (Thermo Fisher)  
408 with the settings: 1400V, 10ms pulse width, and 3 pulses. Cells were selected with 1  $\mu$ gml<sup>-1</sup>  
409 puromycin for three days. Single-cell clones were analyzed by genotyping to confirm GFP in-  
410 frame tagging of the ATRX locus and cell lysates of single clones were subjected to  
411 immunoprecipitation to confirm that GFP-tagged ATRX interacts with its complex partner,  
412 DAXX.

413 *Addback ESCs.* To generate exogenous wild-type or mutants HA-tagged ATRX in ATRX KO  
414 ESCs, 1 x 10<sup>5</sup> ESCs were co-transfected with 1.5  $\mu$ g wild-type or mutants of PB-ATRX-HA-Neo  
415 and 1.5  $\mu$ g Super PiggyBac transposase using Lipofectamine 3000 (Thermo Fisher). After two  
416 days of transfection, cells were selected with 300  $\mu$ gml<sup>-1</sup> Geneticin for 5 days and subjected to  
417 downstream analysis. Generation of stable H3.2, H3.3, and H3.3 mutant (L126A/I130A, LI>AA)  
418 addback cell lines was described previously<sup>10</sup>. To generate exogenous DAXX in DAXX KO  
419 ESCs, cells were transduced with lentivirus encoding Flag-tagged DAXX and 8  $\mu$ gml<sup>-1</sup> polybrene  
420 overnight followed by selection with 1  $\mu$ gml<sup>-1</sup> puromycin for 3 days. To generate lentivirus,  
421 pCDH-Flag-DAXX-Puro plasmid (5  $\mu$ g) and lentiviral components (5  $\mu$ g psPAX2 and 1  $\mu$ g  
422 VSVG) were transfected into 2 x 10<sup>6</sup> 293T cells in a 10 cm<sup>2</sup> dish using Lipofectamine 3000.

423 Lentivirus-containing supernatants from 48h and 72h post-transfection were concentrated with  
424 Lenti-X (Clontech).

425 *ATRX KO HeLa cells.* To generate ATRX KO HeLa cells,  $1 \times 10^5$  cells were transfected with  
426 SpCas9-2A-EGFP plasmid containing a single guide (CAGGATCGTCACGATCAAAGAGG)  
427 targeting exon 4 of the human ATRX gene using Lipofectamine 3000. Two days post-  
428 transfection, single cells were sorted onto gelatin-coated 96-well plates using a FACSaria  
429 Fusion cell sorter according to the instruction of the UT Southwestern Flow Cytometry Facility.  
430 Clones were expanded, genotyped, assessed for protein levels, and subject to downstream  
431 analysis.

432 **Co-immunoprecipitation.** Nuclear extracts were prepared as previously described<sup>11</sup>. For  
433 immunoprecipitation-coupled to mass spectrometry, 5 mg of pre-cleared HeLa nuclear extracts  
434 were incubated overnight at 4°C with either 40 µg ATRX antibody or rabbit IgG cross-linked to  
435 Dynabeads Protein G (Invitrogen). Beads were washed three times with 5 ml wash buffer (20  
436 mM HEPES, pH 7.9, 150 mM KCl, 0.01% NP-40, 10% glycerol, 1 mM DTT, 0.4 mM PMSF) and  
437 once with TE buffer. Samples were eluted in 0.1 M glycine, pH 2 and neutralized with 1 M Tris,  
438 pH 8. To verify ATRX binding specificity, 10% of immunoprecipitated samples were subjected to  
439 immunoblot assay. Remaining samples were run resolved by SDS-PAGE and stained with  
440 Coomassie Blue R-250. The desired bands were excised and subjected to Thermo Orbitrap  
441 Fusion Lumos mass spectrometer. Protein identification was based on counts and sequences of  
442 peptides according to pipelines of UT Southwestern Proteomics Core Facility. For standard  
443 immunoprecipitation, 0.5 mg of nuclear extracts were incubated with 2 µg antibody bound to 10  
444 µl Dynabeads Protein A or Protein G at 4°C for 2 hours. Beads were washed three times with 1  
445 ml wash buffer and eluted in 0.1 M glycine, pH 2. Samples were neutralized with 1 M Tris, pH 8,  
446 denatured in SDS loading buffer and subjected to immunoblot assay.

447 **Mass spectrometry analysis.** Raw mass spectrometry data files were converted to a peak list  
448 format and analyzed using the central proteomics facilities pipeline (CPFP), version 2.2.0.  
449 Peptide identification was performed using the X!Tandem and open MS search algorithm  
450 (OMSSA) search engines against the human protein database from Uniprot, with stable  
451 contaminants and reversed decoy sequences appended. Fragment and precursor tolerances of  
452 20 ppm and 0.5 Da were specified, and three missed cleavages were allowed.  
453 Carbamidomethylation of Cys was set as a fixed modification and oxidation of Met was set as a  
454 variable modification. Label-free quantitation of proteins across samples was performed using  
455 SING normalized spectral index software.

456 **Proximity ligation assay (PLA).** Cells were seeded on glass coverslips coated with  $8 \mu\text{gml}^{-1}$   
457 fibronectin in 12-well plates. Cell cycle synchronization was performed as previously described<sup>62</sup>.  
458 Cells were incubated with 2 mM thymidine for 14h and following  $50 \text{ ngml}^{-1}$  nocodazole treatment  
459 for 7h. Mitotic cells were released and newly synthesized DNA was labeled with 2 µM EdU for  
460 20min in prior to fixation. Cells were fixed with 4% paraformaldehyde in PBS pH 7.4 for 10min at  
461 room temperature then permeabilized in 0.5% Triton X-100 in PBS for 15min.

462 *For ATRX and G4 foci*, cells were fixed and permeabilized as described previously. To detect  
463 newly synthesized DNA, EdU was clicked with 488-azide using a Click-iT™ Cell Reaction kit  
464 (Thermo Fisher, C10269) according to the manufacturer's protocols. Cells were incubated with  
465 100 µgml<sup>-1</sup> RNase A (Sigma, R4642) for 1h at 37°C and then washed in PBS four times for 5min  
466 each. Cells were blocked in Duolink blocking solution for 1h at 37°C and then incubated with  
467 0.06 µg BG4 antibody for 1h at 37°C, then with mouse anti-ATRX antibody diluted 1:100 and  
468 rabbit anti-DYKDDDDK antibody diluted 1:1,000 overnight at 4°C. All primary antibodies were  
469 diluted with Duolink Antibody Diluent. PLA foci were developed with Duolink In Situ Red Starter  
470 Kit (Sigma, DUO92101) according to the manufacturer's protocols. The EdU and PLA  
471 fluorescence signals in representative images for Figure 1e, Figure 3a, Supplementary Figure  
472 2c and Supplementary Figure 7a were pseudocolored red and green, respectively, to clearly  
473 show PLA foci.

474 *For detecting G4 at newly synthesized DNA, in situ* analysis of protein interactions at DNA  
475 replication forks (SIRF) was used<sup>43</sup>. Cells were fixed and permeabilized as described previously.  
476 Biotin-azide added to the Click-iT reaction cocktail and incubated with cells. RNase A treatment,  
477 cell blocking and BG4 antibody incubation were the same as described previously. Cells were  
478 incubated with 1:1000 of mouse biotin antibody and 1:1,000 of rabbit anti-DYKDDDDK antibody  
479 in Duolink Antibody Diluent overnight at 4°C. For normalization of G4-EdU foci, cells were  
480 separately incubated with 1:1,000 of mouse biotin antibody and 1:1,000 of rabbit biotin antibody.  
481 The PLA foci were developed with Duolink In Situ Red Starter Kit. The cover glass was mounted  
482 with the mounting medium containing DAPI in the dark overnight and kept at 4°C or -20°C for  
483 imaging.

484 **Imaging and processing.** Cells were z-stack imaged using a DeltaVision Elite Deconvolution  
485 microscopy (GE Healthcare). Images were further processed by deconvolution using softWoRx  
486 software. Mean fluorescence intensities (MFI) of PLA foci between G4 and EdU were counted  
487 using maximum intensity z-projection of ImageJ. At least 30 nuclei were counted for each  
488 condition. Then the data were normalized to MFI of PLA foci between EdU and EdU in which we  
489 used mouse and rabbit antibodies against biotin-clicked EdU.

490 **Cell viability assay.** 0.5 x 10<sup>3</sup> cells were treated with serial dilutions of PDS (Sigma, SML0678)  
491 for five days on a 96-well plate. Cell viability was analyzed by MTT assay (Sigma, M2128).

492 **Chromatin immunoprecipitation (ChIP).** Crosslinking ChIP was performed according to  
493 published methods<sup>2,63</sup>. Native ChIP was performed according to published methods<sup>11</sup>. Details  
494 are described in supplementary methods.

495 **ChIP-seq and data analysis.** ChIP-seq libraries were prepared from 5 ng ChIP DNA following  
496 the Illumina TruSeq protocol. The size of libraries was determined using a D5000 ScreenTape  
497 on a 2200 TapeStation (Agilent) and the amount of libraries was quantified using a Qubit dsDNA  
498 HS Assay kit (Thermo Fisher). Libraries were paired-end 33-base sequenced on the Illumina  
499 NextSeq 500. Typical sequencing depth was at least 20 million reads per sample.

500 *ChIP-seq data quality control, alignment and spike-in normalization.* Quality of ChIP-seq data  
501 sets was assessed using the FastQC tool (v.0.11.2). ChIP-seq raw reads were aligned  
502 separately to the mouse reference genome (mm10) and the spike-in *Drosophila* reference  
503 genome (dm3) using BOWTIE2 (v.2.2.8). Only one alignment is reported for each read (either  
504 the single best alignment or, if more than one equivalent best alignment was found, one of those  
505 matches selected randomly). Duplicate reads were filtered using the MarkDuplicates tool of  
506 Picard (v.1.127). Uniquely mapped *Drosophila* reads were counted in the sample containing the  
507 least *Drosophila* mapped reads and used to generate a normalization factor for random  
508 downsampling. Reads were converted into bedgraph files using BEDTools (v.2.29.0) and then  
509 converted to bigwig using bedGraphToBigWig utility of UCSC kent tools (v317) for visualization  
510 in Integrative Genomics Viewer (v.2.3).

511 *Peak calling.* ATRX ChIP and ATRX-GFP ChIP samples were merged using MergeSamFiles  
512 tool of Picard (v.2.10.3). Peak calling was performed on the merged files using MACS software  
513 (v.1.4.2) using cut-off values '--pvalue 1e-5 --mfold 10, 30' and GFP ChIP in ESCs (without  
514 GFP) as input.

515 *Box plots.* Box plot representations were used to quantitatively assess the read distribution. Box  
516 plots are defined by the median, box limits at upper and lower quartiles of 75% and 25%, and  
517 whiskers at 1.5x interquartile range. The read distribution of the peaks was calculated and  
518 plotted using custom R scripts.

519 *Average profiles.* BigWig files were used to generate average ChIP-seq profiles using  
520 deepTools (v.3.3.0). The peaks were scaled to the average length of peaks (1300 bp). Read  
521 densities surrounding 4 kb ( $\pm 2$  kb) of the scaled peaks were determined and visualized.

522 *G-quadruplex prediction.* G4 motif was predicted by modifying the Quadparser available at:  
523 <https://github.com/dariober/bioinformatics-cafe/tree/master/fastaRegexFinder>. Sequences within  
524 peak regions were analyzed by regular expression matching for the G4 motif defined below. The  
525 peaks were then assigned to one of two groups: either a G4-containing peak (presence of at  
526 least one motif) or a non G4 containing peak (absence of a G4 motif). G4 motif is defined as:  
527  $'([gG]{3,})w\{1,12\}{3,}[gG]{3,}'$ . The regex looks for 3 or more runs of guanines followed by 1 to  
528 12 of any other bases. This is repeated 3 or more times, ending with 3 runs of guanines.

529 *G-quadruplex enrichment analysis.* Simulation was used to estimate if the number of G-  
530 quadruplex motif is considerably enriched in the ATRX peaks. The peaks were shuffled using  
531 the BEDTools shuffle command at random throughout the genome while maintaining the  
532 number of peaks and their size and the number of G-quadruplexes computed. The fold-  
533 enrichment analysis was calculated by comparing the actual count of G-quadruplex motif within  
534 ATRX peak regions to the average count of the same peak regions after hundred  
535 randomizations.

536

537 *Motif Analysis.* Multiple EM for motif elicitation (MEME) was used to interrogate the peak  
538 sequence data set for recurring motifs across G4 and non-G4 peaks.

539

540 *Peak Annotation.* Peaks were annotated to nearest genes using HOMER annotatePeaks.pl with  
541 default settings.

542 **ATAC-seq and analysis.** ATAC-seq was performed and analyzed as previously described<sup>64</sup>.  
543 Additional details are described in supplementary methods.

544 **CUT&Tag and analysis.** CUT&Tag was performed and analyzed as previously described<sup>65,66</sup>.  
545 Additional details can be found in supplementary methods.

546 **Analysis of mutation rates from patient data.** Observed G-quadruplex regions in the human  
547 genome were downloaded from GSE110582 in the form of bedfiles. G4 regions enriched after  
548 PDS treatment were identified using G4-seq2 methodology as previously described<sup>67</sup>. For each  
549 gene, donors were selected from the International Cancer Genome Consortium Data Portal<sup>68</sup>  
550 who were classified as having high impact functional mutations in that gene. All simple somatic  
551 mutations (SSMs) within that donor set were then intersected with the above G4 regions using  
552 bedtools intersect -u. The total number of substitutions and INDELS for each gene's donor set  
553 were counted. Likewise, for each gene, null donor sets were created by randomly sampling the  
554 same number of donors from the total pool of 19,729 ICGC donors with available SSM data and  
555 counting G4-intersecting substitutions and INDELS within that set. This was repeated 504 times  
556 for each gene in order to create a null distribution for that gene.

557  
558 Null distribution for each gene was standardized by centering at the mean and scaling by  
559 standard deviation (s.d.). For the test observation itself (red line), we standardized by  
560 subtracting the mean of the null and scaling by the s.d. of the null. We calculated the p value  
561 from first definitions by calculating the area under the curve (AUC) to the right of the observed  
562 point using the null distribution.

563  
564 **Statistical analysis.** Data analysis was performed using Prism 8 for PLA, MTT assay and  
565 ChIP-qPCR. Quantification of PLA data is presented as scatter dots on box-and-whisker plots  
566 marking a horizontal median line. In box and whisker plots, box and whiskers indicate 25-75 and  
567 10-90 percentiles, respectively. Statistical significance is determined by One-way ANOVA test  
568 or two-tailed Mann-Whitney U test, where noted. Number of individual values for each  
569 experiment are reported in the figure legends. For MTT data, mock-treated cells at day 0 were  
570 taken as 100% survival. Quantification of MTT data is presented as a XY graph or column graph  
571 with mean  $\pm$  SD. Statistical significance is determined by Two-way ANOVA test. Data are  
572 representative of three independent experiments unless indicated in the figure legends. Half-  
573 maximal inhibitory concentration (IC50) was determined by nonlinear regression. Statistical  
574 significance is determined by One-way ANOVA test for ChIP-qPCR. Wilcoxon rank sum test  
575 was used to calculate p values for all comparisons in NGS datasets. \*p < 0.05; \*\*p < 0.01; \*\*\*p <  
576 0.001; ns, not significant.

577  
578 **Data sets.** The following published next-generation sequencing data sets were meta-analysed  
579 in this study: (1) ChIP-ATRAX in ESCs<sup>2</sup>, H3K9me3 for WT, ATRX KO, DAXX KO, H3.3 KO,  
580 ESET KO<sup>69</sup>, and ESET KO re-ChIP<sup>11</sup>, H3.3 for WT, ATRX KO, DAXX KO, ESET KO<sup>11,60</sup> and  
581 H3K27ac for WT, ATRX KO and DAXX KO<sup>60</sup>; (2) RNA-seq in WT, ATRX KO, DAXX KO and

582 H3.3 KO<sup>60,70</sup>; (3) ATAC-seq in HIRA KO1, H3.3 KO<sup>60</sup> and H3.3 addback<sup>10</sup>; (4) SNS-seq in  
583 ESCs<sup>71</sup>; (5) G4-seq in human cells<sup>67</sup> and (6) Pan-cancer analysis of whole genome<sup>72</sup>. Also,  
584 **Supplementary Table 3.**

585

586 **Code Availability.** Code to generate figures is available upon request.

587

588 **Data Availability.** Data files have been deposited in the Gene Expression Omnibus database  
589 under accession number GSE---. The mass spectrometry proteomics data have been deposited  
590 to MassIVE with the dataset identifier MSV---.

591

592 **Supplementary Data.** Supplementary data is available online.

593

### 594 **FUNDING**

595 L.A.B. is a Virginia Murchison Linthicum Scholar in Medical Research (UTSW Endowed  
596 Scholars Program), an American Cancer Society Research Scholar, and a Peterson  
597 Investigator of the Neuroendocrine Research Foundation (NETRF). This work was supported in  
598 part by CPRIT RR140042, The Welch Foundation I-1892 and I-2025, and NIH R35 GM124958  
599 (L.A.B.), the Taiwan Postdoctoral Research abroad Fellowship (Y.-C.T.), the American-Italian  
600 Cancer Foundation and the Center for Regenerative Sciences and Medicine at UTSW (S.M.),  
601 and the Green Center for Reproductive Biology Sciences.

602

### 603 **ACKNOWLEDGMENTS**

604 We thank members of the Banaszynski lab and H. Yu for helpful discussions; E. Duncan for  
605 critical comments on the manuscript; UTSW BioHPC for computational infrastructure; UTSW  
606 McDermott Center for providing next-generation sequencing services; UTSW Flow Cytometry  
607 Core; UTSW Live Cell Imaging Core; UTSW Proteomics Core for mass spectrometry.

608

### 609 **AUTHOR CONTRIBUTIONS**

610 Y.-C.T. and L.B. conceived and designed the study; Y.-C.T. performed experiments with help  
611 from V.G., M.L., S.M., and J.W.; A.S. and R.O. performed computational analysis; R.O. and  
612 A.B. performed patient mutation analysis; L.A.B. supervised and provided funding for the  
613 project; Y.-C.T. and L.A.B. wrote the manuscript with input from all authors.

614

615

616

617

618

619

620



## Teng et al., Figure 1

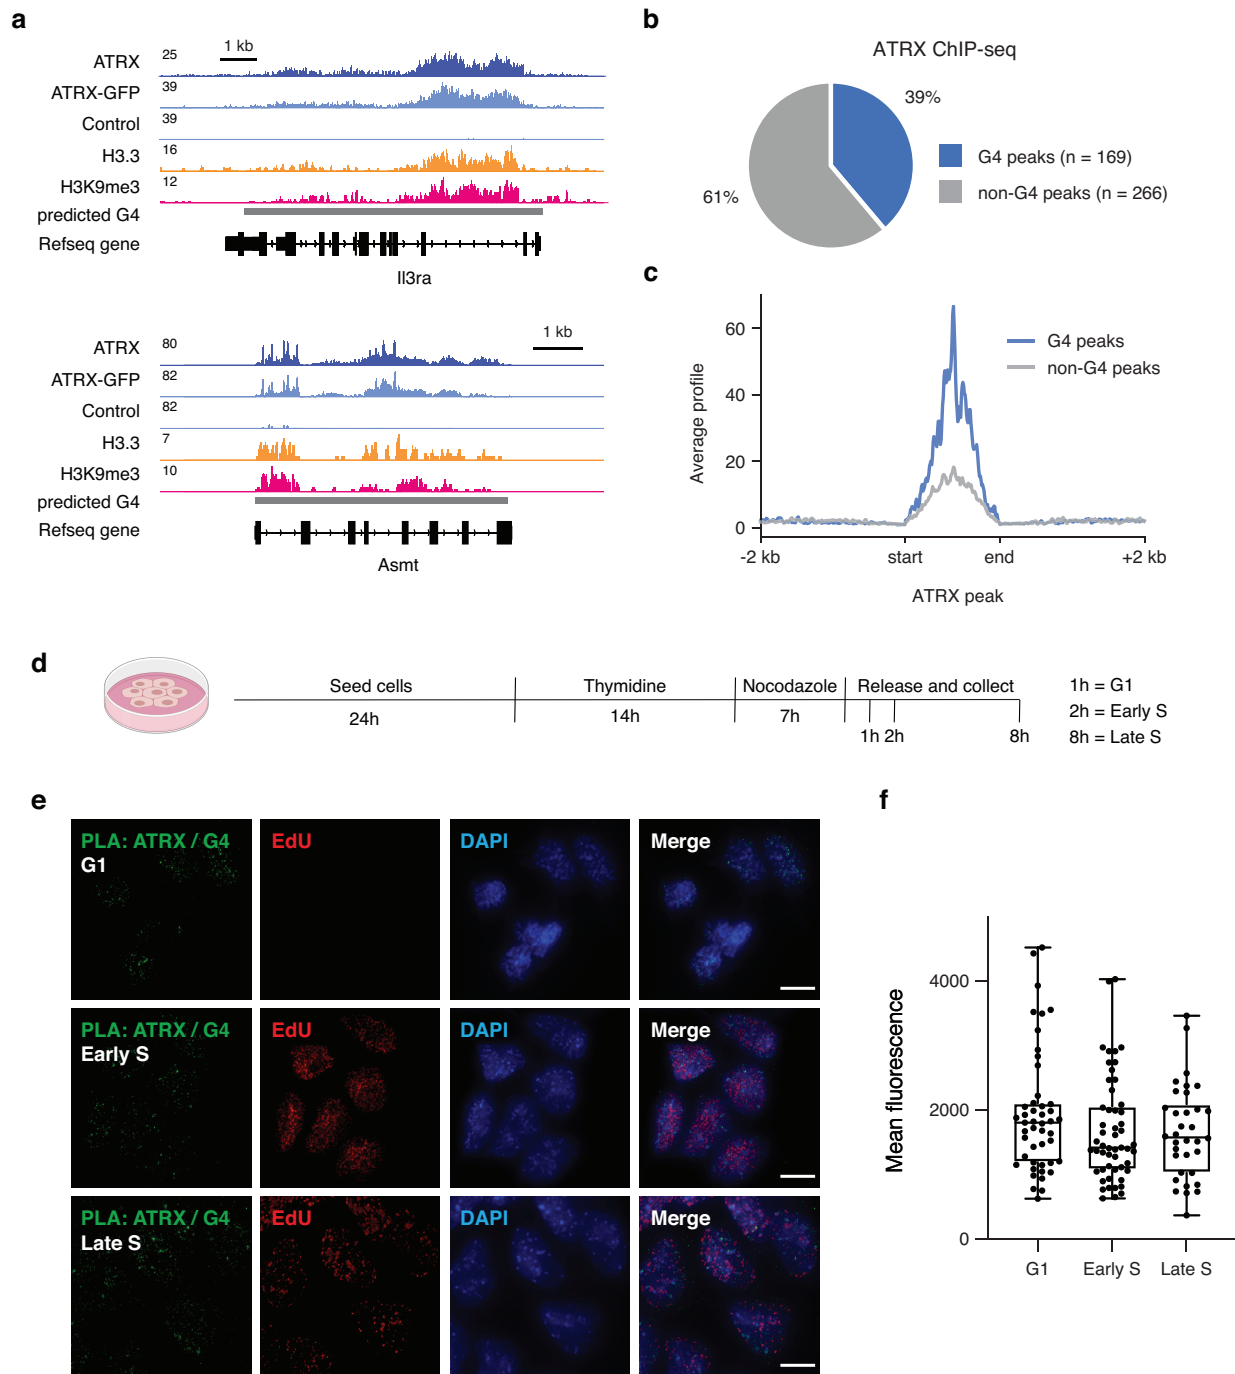

621  
622

623 **Figure 1** ATRX associates with G4 structures *in vivo*. (a) Genome browser representations of  
624 ATRX, ATRX-GFP, H3.3, and H3K9me3 ChIP-seq at predicted G4 regions in ESCs. Data  
625 represented as read density in reads per kilobase per million mapped reads (RPKM) normalized  
626 to an external standard for each data set. Gray boxes indicate predicted G4 regions. (b) ChIP-  
627 seq analysis of ATRX enrichment in ESCs. Pie chart represents the percentage of ATRX-  
628 enriched regions containing G4 consensus motifs (169/435, 39%). (c) ATRX ChIP-seq average

629 profiles in ESCs at ATRX-enriched regions containing G4 consensus motifs (G4) compared with  
630 ATRX-enriched regions that do not contain a G4 consensus motif (non-G4). **(d)** Schematic of  
631 ESCs synchronization protocol. Cells are incubated with thymidine for 14h, washed, and treated  
632 in medium with nocodazole for 7h. After washing, mitotic cells are released in medium and  
633 incubated with EdU in prior cell fixation for downstream experiments. Cells in G1, early S, and  
634 late S phase were analyzed 1h, 2h, and 8h after release, respectively. **(e)** Representative  
635 images demonstrating ATRX and G4 colocalization by proximity ligation assay (PLA) in  
636 synchronized ESCs. Green - PLA (ATRX-G4). Red - EdU-labeling, indicative of newly  
637 synthesized DNA. Blue - DAPI nuclear stain. Scale bar equals 10  $\mu\text{m}$ . **(f)** Quantification of signal  
638 intensity from ATRX-G4 PLA foci in G1 (n=47), early S (n=53) and late S (n=34) phases of  
639 ESCs. No statistical significance was determined by One-way ANOVA test.  
640  
641

## Teng et al., Figure 2

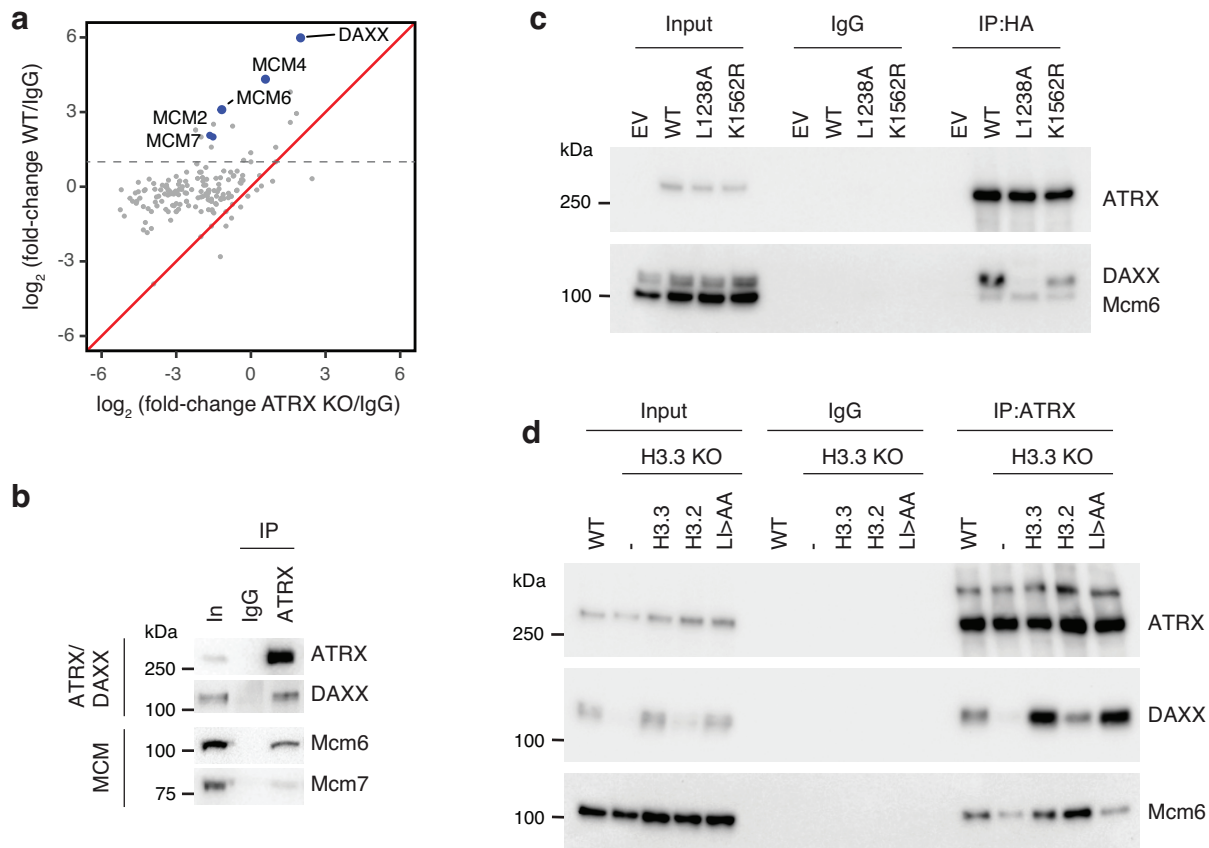

642  
643

644 **Figure 2** ATRX associates with the MCM DNA helicase. (a) Proteomic analysis of ATRX-  
645 interacting proteins. Mass spectrometry data represented a scatter plot of the  $\log_2$  abundance  
646 ratios of ATRX-enriched proteins compared to IgG control in both wild-type and ATRX KO HeLa  
647 cells. Gray dotted line indicates a fold-change > 2 in ATRX-enriched proteins compared to IgG  
648 control. (b) Co-immunoprecipitation from wild-type ESC nuclear extracts showing ATRX  
649 interaction with DAXX, Mcm6 and Mcm7. (c) Co-immunoprecipitation from ATRX KO addback  
650 ESC nuclear extracts showing HA-tagged ATRX interaction with DAXX and Mcm6. K1562R -  
651 ATRX mutation in helicase domain; L1238A - ATRX mutation in DAXX-binding motif. (d) Co-  
652 immunoprecipitation from H3.3 KO addback ESC nuclear extracts showing ATRX interaction  
653 with DAXX and Mcm6. H3.3 LI/AA - H3.3 deposition mutant.

654  
655

## Teng et al., Figure 3

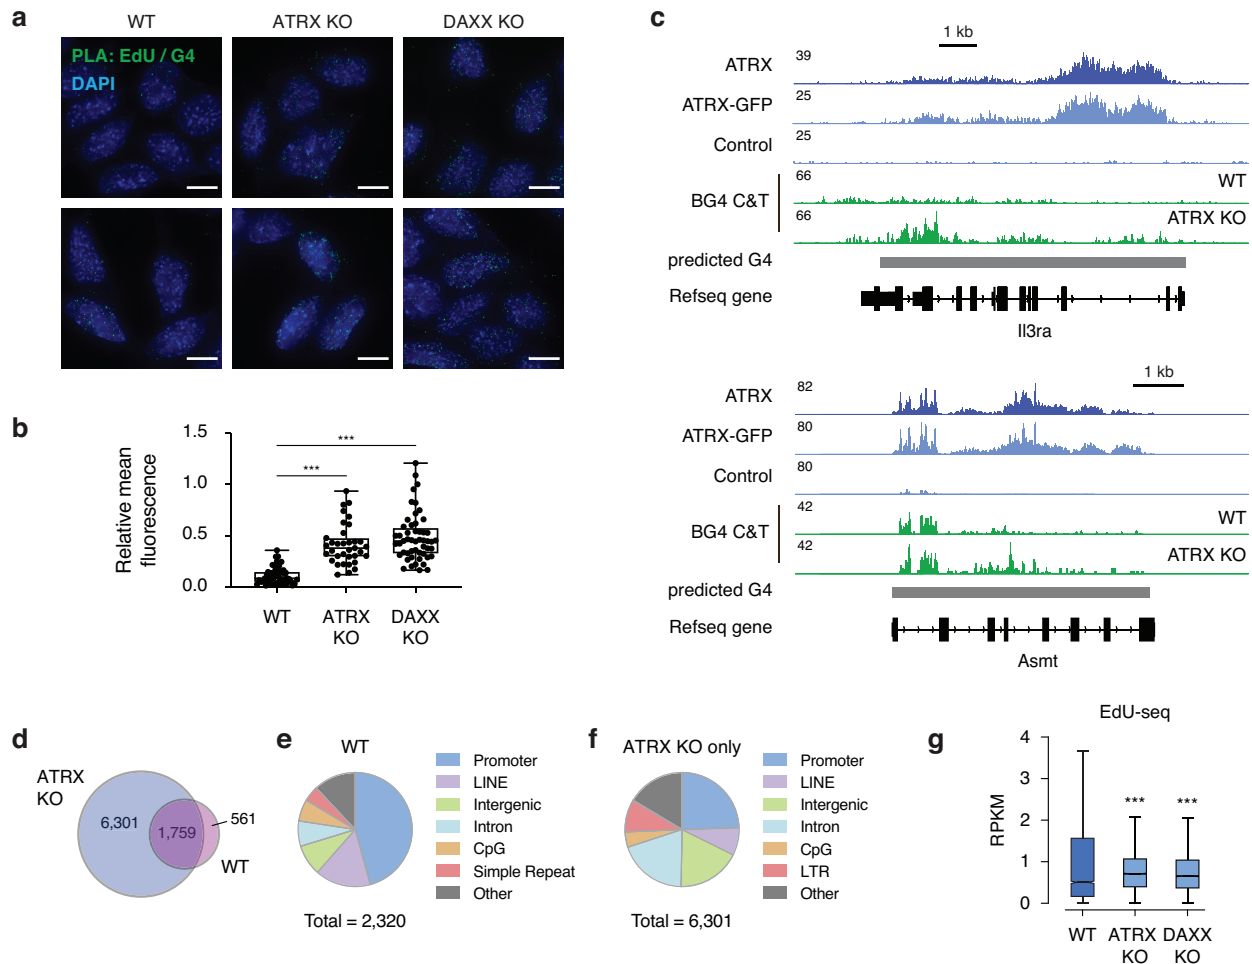

656  
 657

658 **Figure 3** ATRX prevents the accumulation of G4 structures at sites of DNA synthesis. **(a)**  
 659 Representative images demonstrating EdU and G4 co-localization by proximity ligation assay  
 660 (PLA) in synchronized ESCs at early S phase. Green - PLA (EdU-G4). Blue - DAPI nuclear  
 661 stain. Scale bar equals 10  $\mu$ m. **(b)** Quantification of signal intensity from EdU-G4 PLA foci in  
 662 wild-type (n=48), ATRX KO (n=35) and DAXX KO (n=52) ESCs. Statistical significance  
 663 determined by a One-way ANOVA test. \*\*\*P < 0.001. **(c)** Genome browser representations of  
 664 ATRX, ATRX-GFP ChIP-seq and BG4 CUT&Tag at observed G4 regions in ESCs. **(d-f)**  
 665 CUT&Tag analysis of G4 enrichment in ESCs. **(d)** Venn diagram showing the unique and  
 666 overlaps between wild-type and ATRX KO ESCs. **(e and f)** Pie chart of genomic region  
 667 annotation in wild-type **(e)** and ATRX KO ESCs **(f)**. **(g)** Box plots representing EdU-seq read  
 668 counts of early S phase in wild-type, ATRX KO and DAXX KO ESCs at observed G4 regions  
 669 that are only identified in ATRX KO (n=6,301). Data are representative of two independent  
 670 experiments. The bottom and the top of the boxes correspond to the 25th and 75th percentiles,  
 671 and the internal band is the 50th percentile (median). The plot whiskers correspond to 1.5  
 672 interquartile range. Statistical significance determined by Wilcoxon Mann Whitney test.  
 673 \*\*\*p < 0.001.

## Teng et al., Figure 4

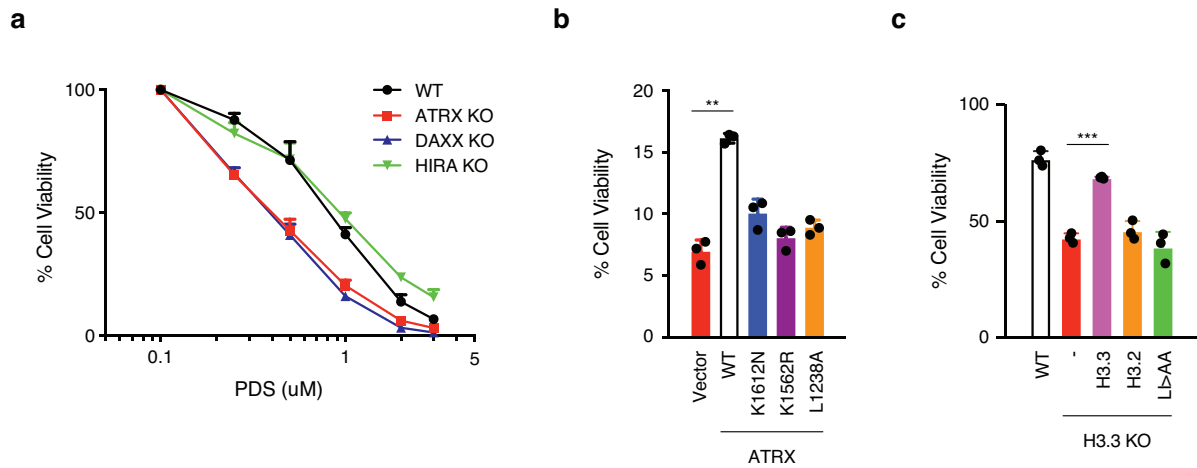

674  
675

676 **Figure 4** ATRX requires its helicase and chaperone activity to protect from G4-induced stress.  
677 (a) Cell viability of wild-type, ATRX KO, DAXX KO, and HIRA KO ESCs treated with PDS for 5  
678 days. IC<sub>50</sub>: wild-type - 0.804 µM, ATRX KO - 0.396 µM, DAXX KO - 0.384 µM, HIRA KO - 0.909  
679 µM. (b) Cell viability of ATRX KO ESCs exogenously expressing either wild-type or mutant  
680 ATRX constructs treated with 2 µM PDS for 5 days. K1612N and K1562R - ATRX mutations in  
681 helicase domain; L1238A - ATRX mutation in DAXX-binding motif. (c) Cell viability of H3.3 KO  
682 ESCs exogenously expressing either wild-type or mutant H3.3 (L126A I130A, LI/AA) or H3.2  
683 constructs treated with 1 µM PDS for 5 days. For both panels, mock-treated cells at day 0 were  
684 taken as 100% survival. Data represented as mean ± SD (n=3). Statistical significance  
685 determined by a Two-way ANOVA test. \*\*p < 0.01; \*\*\*p < 0.001.

686  
687

## Teng et al., Figure 5

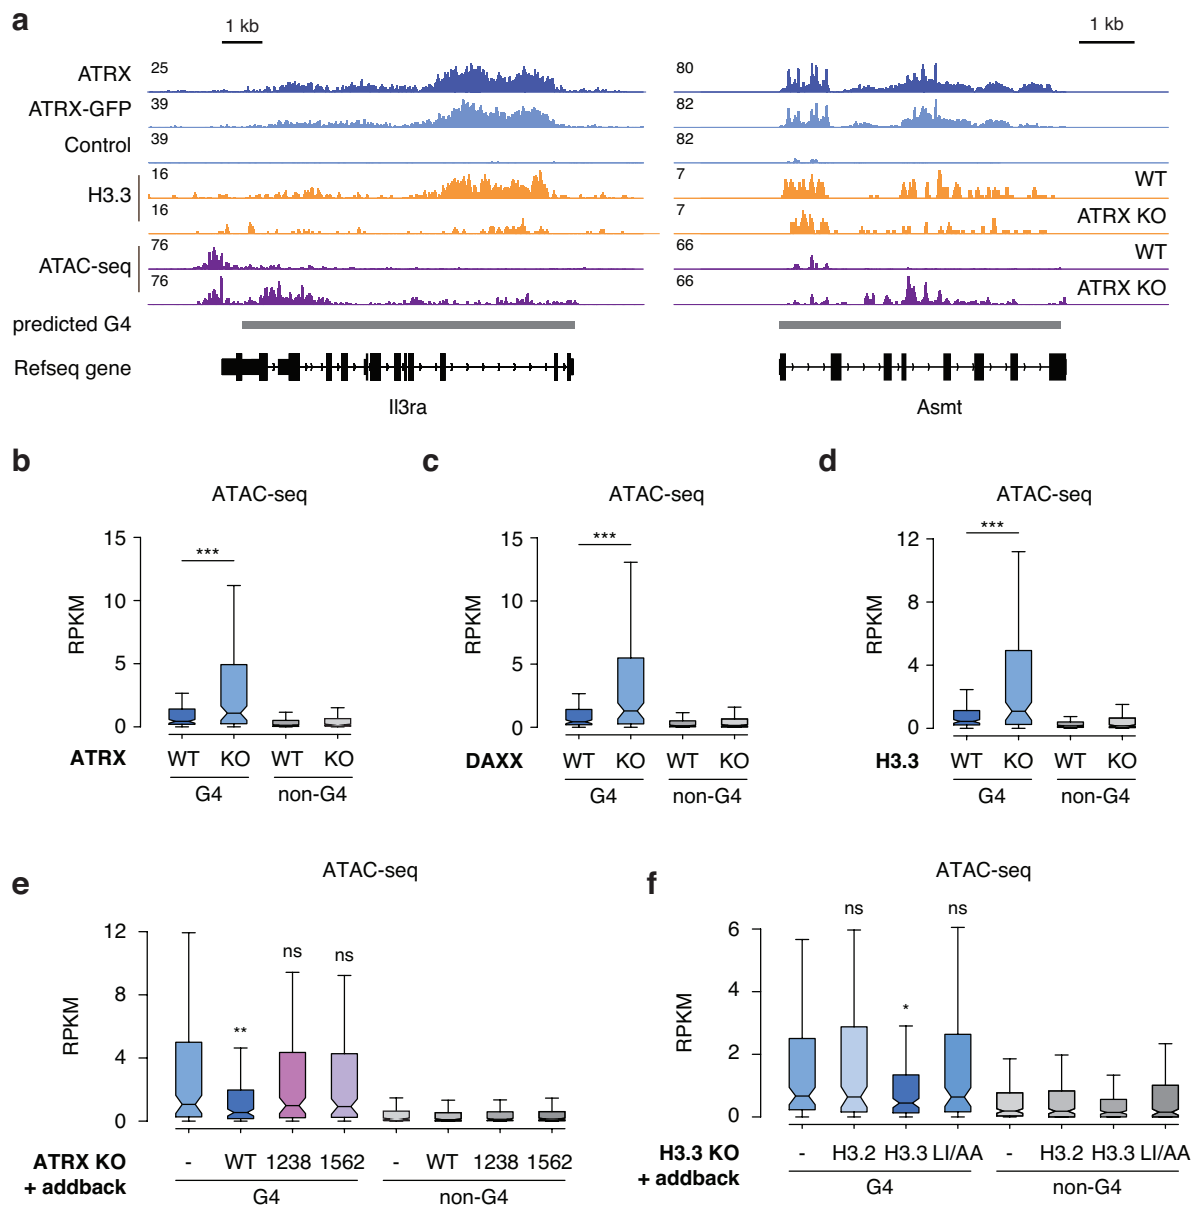

688  
689

690 **Figure 5** ATRX maintains closed chromatin states at G4 structures. **(a)** Genome browser  
 691 representations of ATRX, ATRX-GFP, H3.3 ChIP-seq and ATAC-seq at predicted G4 regions in  
 692 ESCs. Box plots representing ATAC-seq read counts at ATRX-enriched G4 and non-G4 regions  
 693 in wild-type ESCs compared to **(b)** ATRX KO, **(c)** DAXX KO and **(d)** H3.3 KO ESCs. **(e)** Box  
 694 plots representing ATAC-seq read counts at ATRX-enriched G4 and non-G4 regions in ATRX  
 695 KO ESCs exogenously expressing either wild-type or mutant ATRX constructs. **(f)** Box plots  
 696 representing ATAC-seq read counts at ATRX-enriched G4 and non-G4 regions in H3.3 KO  
 697 ESCs exogenously expressing either wild-type H3.2, H3.3 or mutant H3.3 constructs. Data are  
 698 representative of two independent experiments. The bottom and the top of the boxes  
 699 correspond to the 25th and 75th percentiles, and the internal band is the 50th percentile

700 (median). The plot whiskers correspond to 1.5 interquartile range. Statistical significance  
701 determined by Wilcoxon Mann Whitney test compared to ATRX KO (e) and H3.3 KO in (f). \* $p <$   
702 0.05; \*\* $p < 0.01$ ; \*\*\* $p < 0.001$ . ns, not significant.  
703  
704

## Teng et al., Figure 6

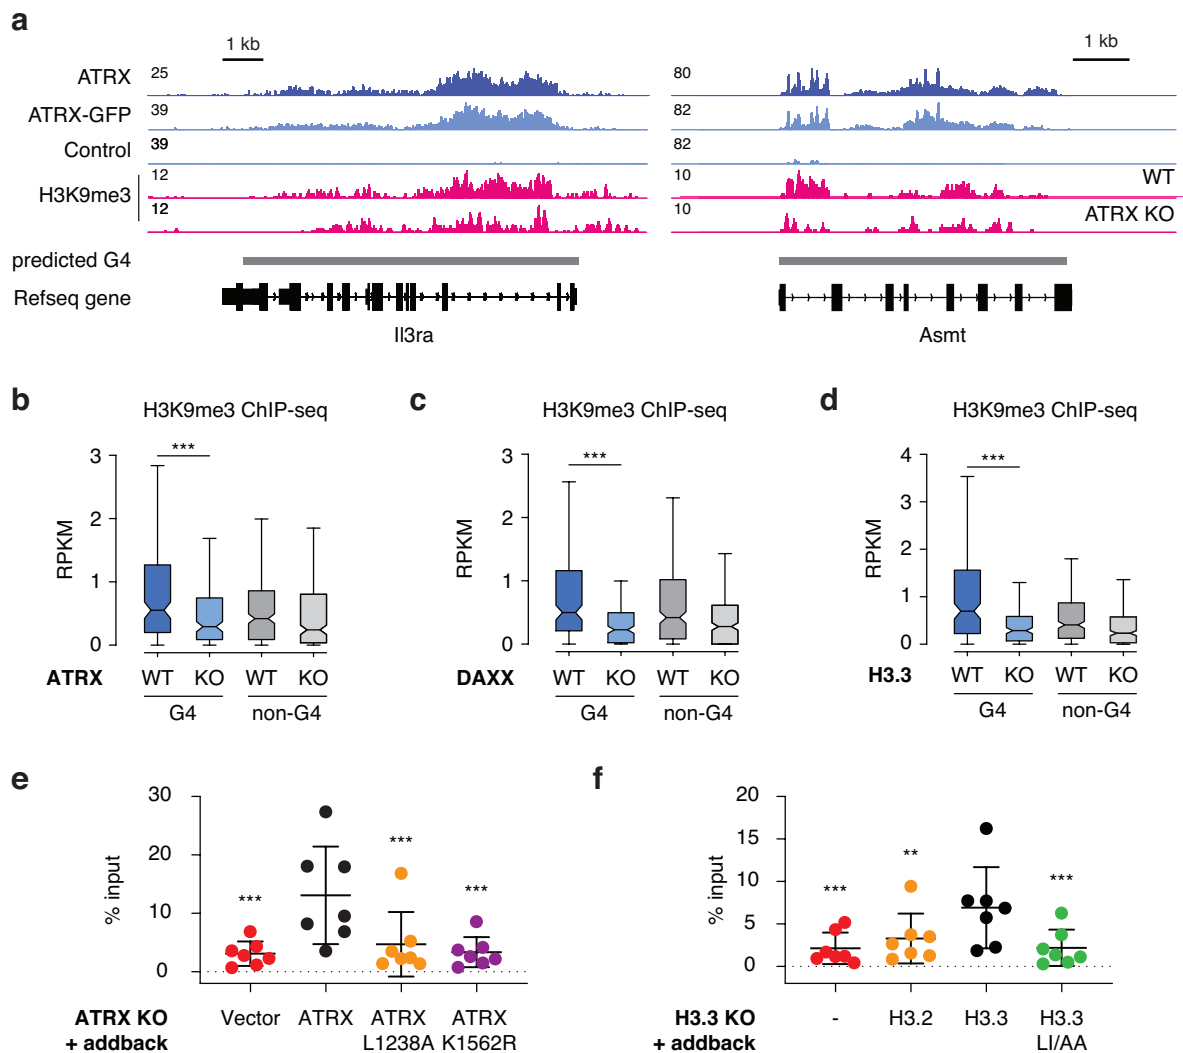

705  
706

707 **Figure 6** ATRX/DAXX/H3.3 are key factors for H3K9me3 maintenance at G4 regions. (a)  
708 Genome browser representations of ATRX, ATRX-GFP, and H3K9me3 ChIP-seq at predicted  
709 G4 regions in ESCs. Box plots representing ChIP-seq read counts for H3K9me3<sup>11</sup> at ATRX-  
710 enriched G4 and non-G4 regions in wild-type ESCs compared to (b) ATRX KO, (c) DAXX KO  
711 and (d) H3.3 KO cells. Data are representative of two independent experiments. The bottom  
712 and the top of the boxes correspond to the 25th and 75th percentiles, and the internal band is  
713 the 50th percentile (median). The plot whiskers correspond to 1.5 interquartile range. Statistical  
714 significance determined by Wilcoxon Mann Whitney test. \*\*\* $p < 0.001$ . (e) ChIP-qPCR of  
715 H3K9me3 at ATRX-enriched G4 regions ( $n = 7$ ) in ATRX KO ESCs exogenously expressing  
716 either wild-type or mutant ATRX constructs. (f) ChIP-qPCR of H3K9me3 at ATRX-enriched G4  
717 regions ( $n = 7$ ) in H3.3 KO ESCs exogenously expressing either wild-type H3.2, H3.3 or mutant  
718 H3.3 constructs. Data represent mean  $\pm$  SD. Statistical significance determined by one-way



719 ANOVA compared to ATRX KO + ATRX in (e) and H3.3 KO + H3.3 in (f). \*\*p < 0.01; \*\*\*p <  
720 0.001.  
721  
722

## Teng et al., Figure 7

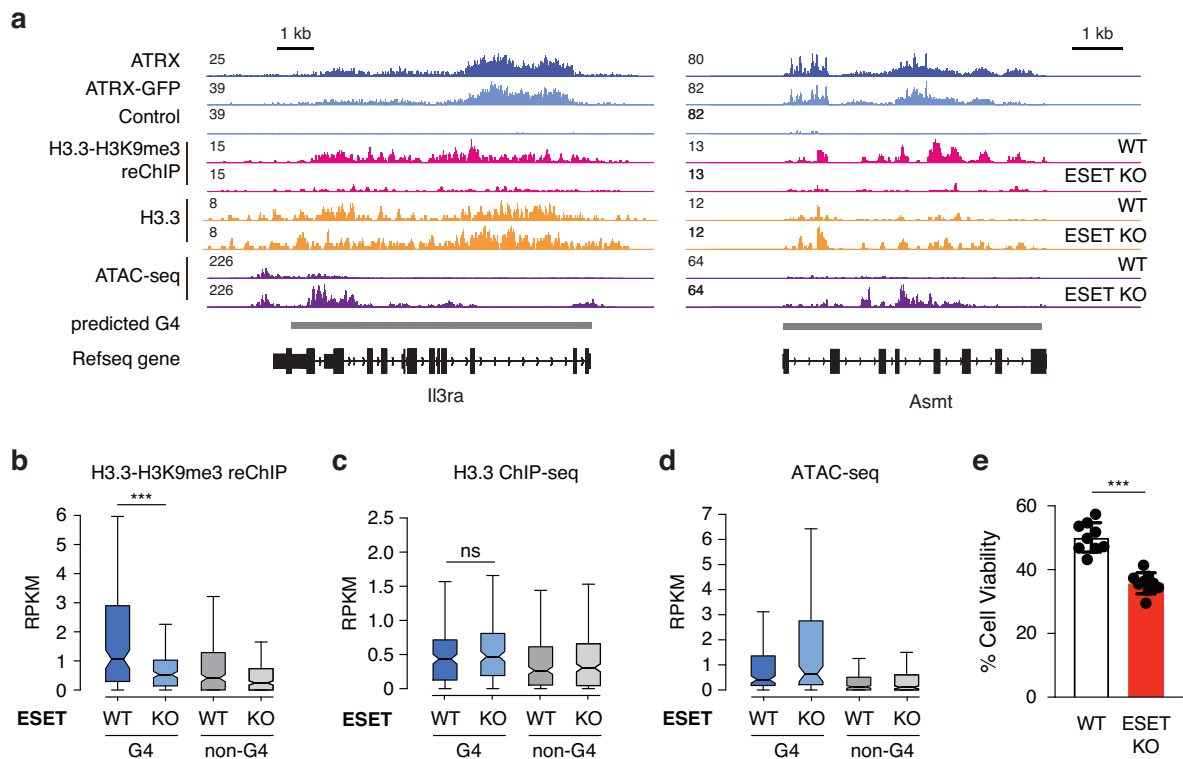

723  
 724  
 725  
 726  
 727  
 728  
 729  
 730  
 731  
 732  
 733  
 734  
 735  
 736  
 737

**Figure 7** ESET facilitates heterochromatin at G4 regions and protects cells from G4-mediated stress. **(a)** Genome browser representations of ATRX, ATRX-GFP, H3.3-H3K9me3 reChIP-seq, H3.3 ChIP-seq, and ATAC-seq at predicted G4 regions in ESCs. Box plots representing **(b)** H3.3-H3K9me3 reChIP-seq<sup>11</sup>, **(c)** H3.3 ChIP-seq<sup>11</sup>, and **(d)** ATAC-seq at ATRX-enriched G4 and non-G4 regions in wild-type ESCs compared to ESET KO ESCs. The bottom and the top of the boxes correspond to the 25th and 75th percentiles, and the internal band is the 50th percentile (median). The plot whiskers correspond to 1.5 interquartile range. Statistical significance determined by Wilcoxon Mann Whitney test. \*\*\*p < 0.001; ns: not significant. **(e)** Cell viability of wild-type and ESET KO ESCs treated with 1  $\mu$ M of PDS for 3 days. Mock-treated cells at day 0 were taken as 100% survival. Data represented as mean  $\pm$  SD (n=9). Statistical significance determined by Two-way ANOVA test. \*\*\*p < 0.001.

## Teng et al., Figure 8

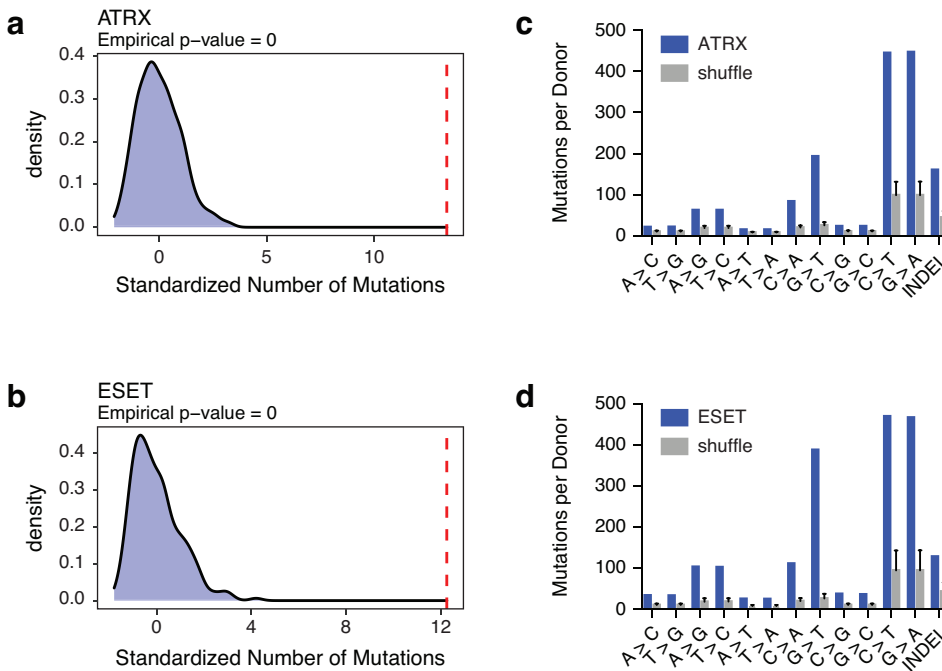

738

739

740

741

742

743

744

745

746

747

748

**Figure 8** Mutations at G4 regions are highly correlated with ATRX and ESET mutations in human tumors. **(a and b)** Red line shows standardized number of mutations at G4 regions in ATRX **(a)** or ESET **(b)** mutant tumors. Histograms show the mutation density at observed G4 regions in an iteratively and randomly selected patient cohort of the same size. p-value calculated as described in methods. **(c and d)** Analysis of single-nucleotide mutations and insertion-deletion (INDEL) mutations in the ATRX **(c)** or ESET **(d)** mutant tumors compared with the shuffled patient cohort described above.

## Teng et al., Figure 9

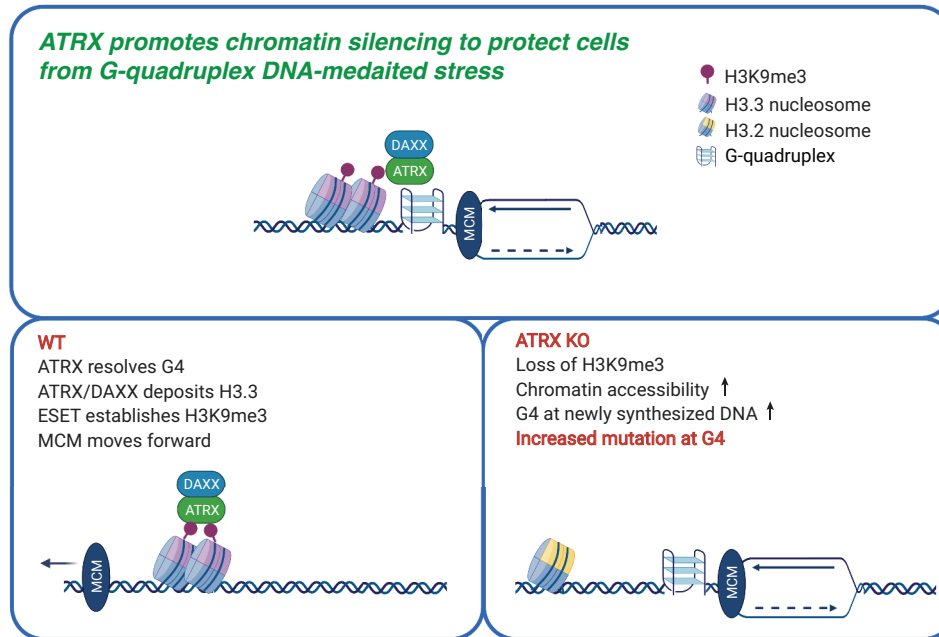

749  
750  
751  
752  
753  
754  
755  
756  
757  
758

**Figure 9** ATRX is a critical chromatin remodeler at G-quadruplex regions during DNA replication. When the replicative MCM helicase complex encounters G4 DNA, ATRX resolves G4 DNA through its helicase activity and H3.3 deposition activity to facilitate MCM progression. These activities are ultimately upstream of ESET-mediated heterochromatin formation to protect cells from G4-mediated replicative stress. Thus, ATRX/DAXX/H3.3 and ESET cooperate to prevent physical G-quadruplex stress and maintain genome stability.

## Teng et al., Supplementary Fig. 1

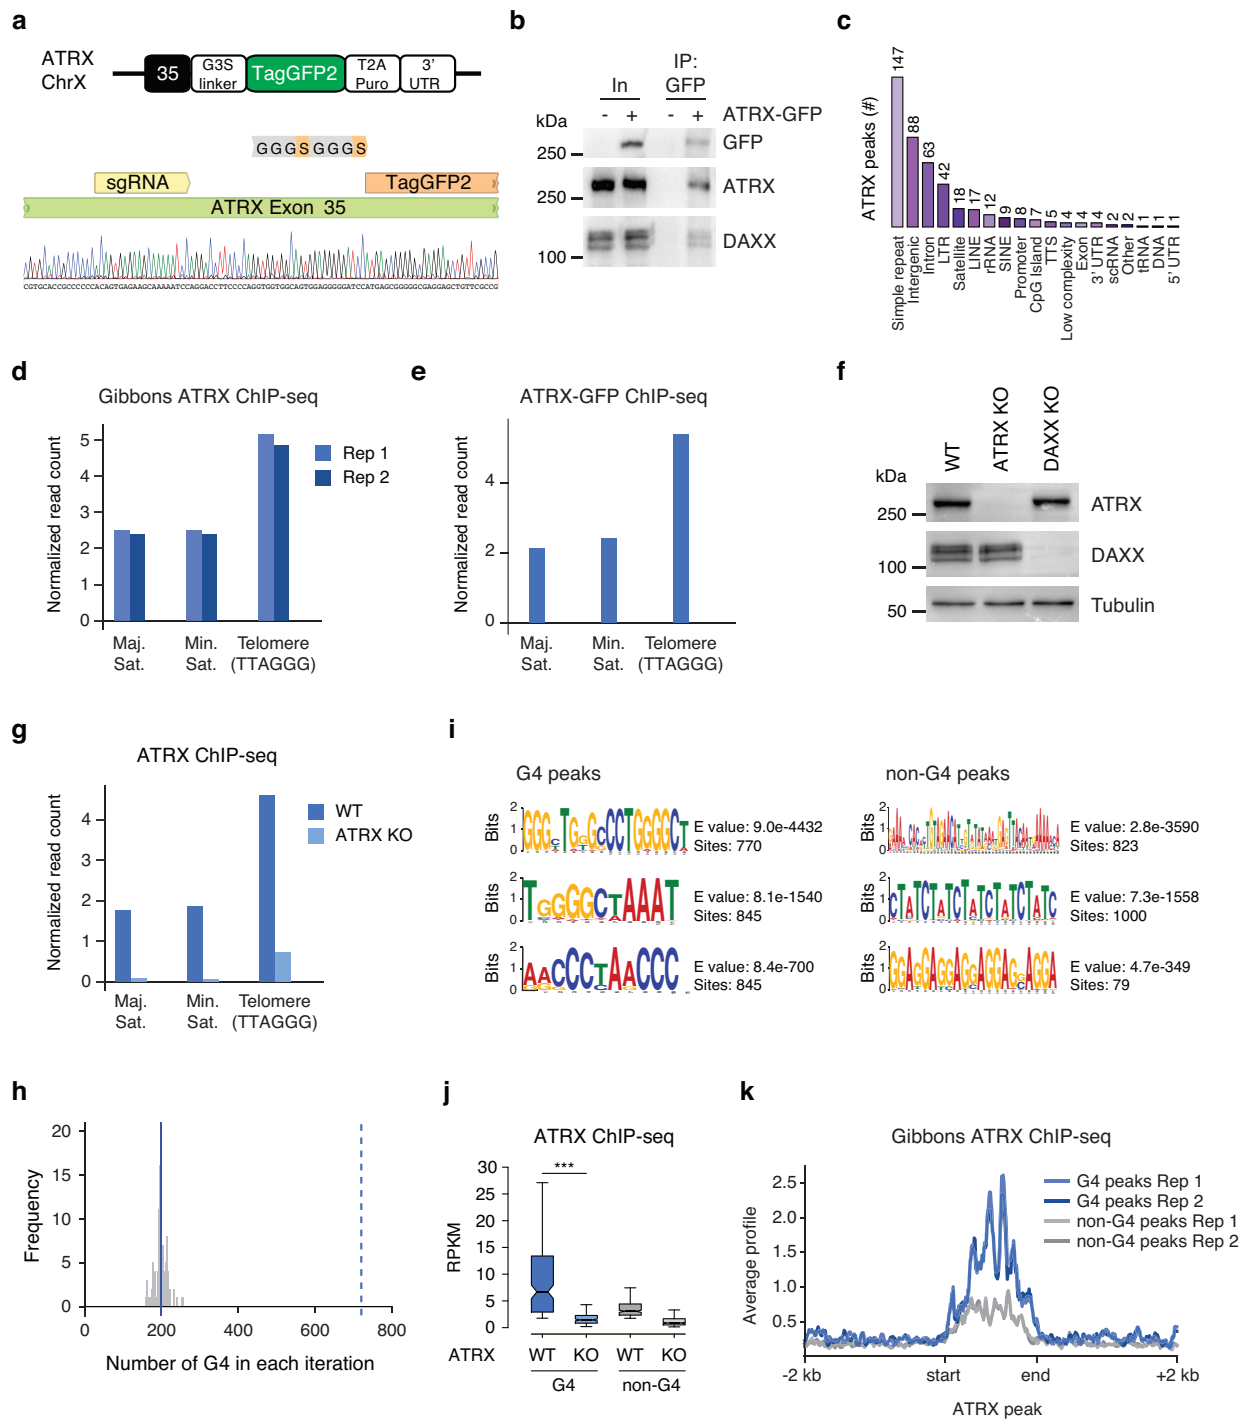

759  
760  
761  
762  
763  
764

**Supplementary Figure 1. ATRX is enriched at repetitive elements and predicted G4 elements.** Related to Figure 1. (a) Schematic of GFP tagging of the endogenous mouse ATRX gene. An sgRNA targets exon 35 of ATRX gene. A CRISPR/Cas9-mediated homology directed repair system allows selection for positively tagged cells based on expression of a puromycin

765 resistance gene separated from the GFP sequence by a T2A peptide. Genotyping shows a  
766 single-cell clone with the GFP gene inserted in-frame into the ATRX gene. **(b)** Co-  
767 immunoprecipitation from ESC nuclear extracts showing ATRX-GFP interaction with DAXX. **(c)**  
768 Peak Annotation. The x axis represents the annotation category and the number above the bar  
769 graph represents the number of peaks in the particular annotation category. **(d)** Published  
770 ATRX ChIP-seq in ESCs shows ATRX enrichment at telomeres and satellite sequences<sup>2</sup>. **(e)**  
771 ATRX-GFP ChIP-seq in ESCs shows ATRX-GFP enrichment at telomeres and satellite  
772 sequences. **(f)** Immunoblot from ESC whole-cell lysates showing the expression of ATRX and  
773 DAXX in wild-type, ATRX KO and DAXX KO ESCs. Tubulin as loading control. **(g)** ATRX ChIP-  
774 seq in ESCs shows ATRX enrichment at telomeres and satellite sequences. This enrichment is  
775 reduced in ATRX KO ESCs. **(h)** The histogram shows the number of a G-quadruplex motif in  
776 random sequences compared with the 720 observed number of G-quadruplex motif (dashed  
777 line). Simulation was used to estimate the number of G-quadruplex motif by chance. For 100  
778 times, the peaks were randomly shuffled throughout the genome while maintaining the number  
779 of peaks and their size and the number of G-quadruplexes computed. On average, 198 G-  
780 quadruplexes (sd= 17) (solid line) were observed therefore the observed number of G-  
781 quadruplex motifs is significantly larger (by 30 standard deviations) than expected by chance. **(i)**  
782 Motif enrichment for ATRX-enriched G4 (left) and non-G4 (right) peaks. **(j)** Box plots  
783 representing ATRX ChIP-seq in ESCs at ATRX-enriched G4 and non-G4 regions in wild-type  
784 and ATRX KO cells. The bottom and the top of the boxes correspond to the 25th and 75th  
785 percentiles, and the internal band is the 50th percentile (median). The plot whiskers correspond  
786 to 1.5 interquartile range. Statistical significance is determined by Wilcoxon Mann Whitney test.  
787 \*\*\*P < 0.001. **(k)** Published ATRX ChIP-seq average profiles in ESCs for ATRX-enriched G4  
788 and non-G4 regions<sup>2</sup>.  
789  
790

## Teng et al., Supplementary Fig. 2

**a**

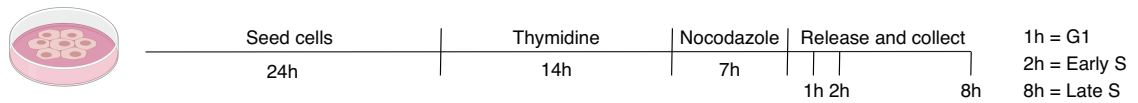

**b**

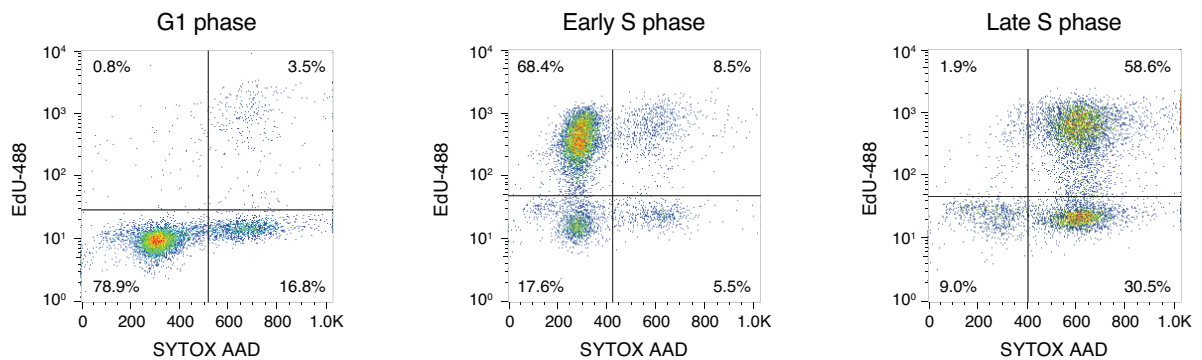

**c**

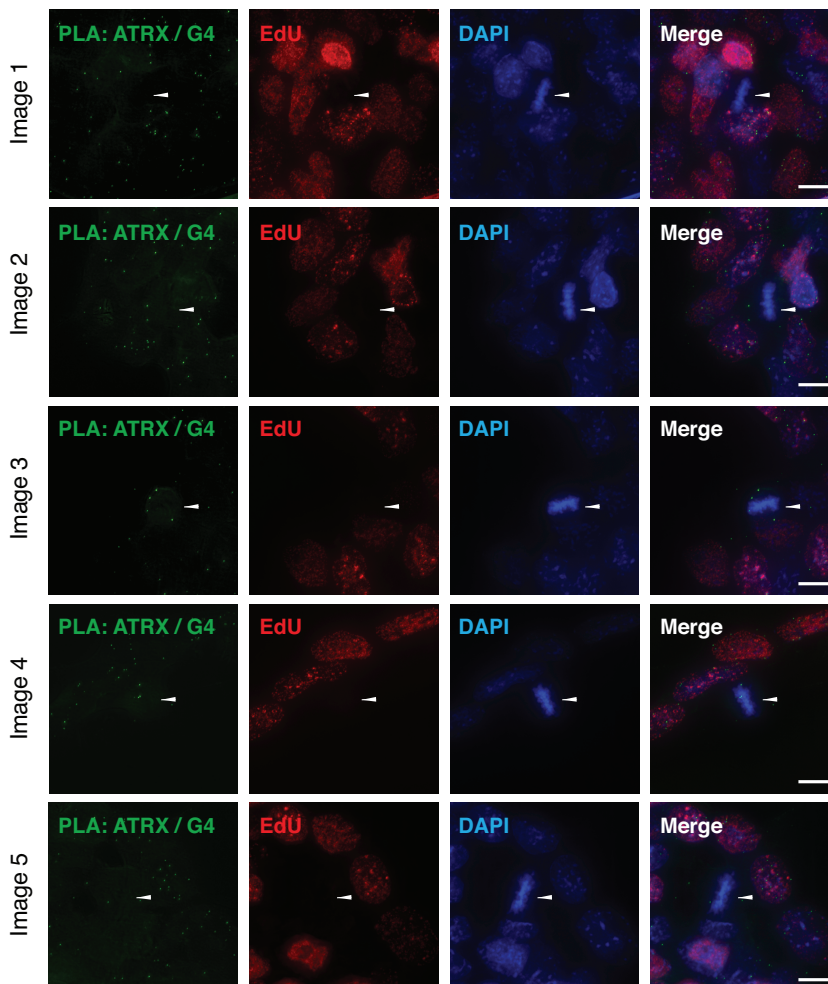

792

793 **Supplementary Figure 2. Cell cycle analysis of synchronized ESCs.** Related to Figure 1. **(a)**

794 Schematic of ESCs synchronization protocol. Cells are incubated with thymidine for 14h,

795 washed, and treated in medium with nocodazole for 7h. After washing, mitotic cells are released

796 in medium and incubated with EdU in prior cell fixation for downstream experiments. Cells in

797 G1, early S, and late S phase were analyzed 1h, 2h, and 8h after release, respectively. **(b)** Cell

798 cycle profiles of ESCs in G1, early S and late S phases. **(c)** Representative images assessing

799 ATRX and G4 colocalization by proximity ligation assay (PLA) in asynchronized ESCs. Green -

800 PLA (ATRX-G4). Red - EdU-labeling, indicative of newly synthesized DNA. Blue - DAPI nuclear

801 stain. Scale bar equals 10  $\mu$ m. Arrows indicate metaphase chromosomes.

802

803



## Teng et al., Supplementary Fig. 3

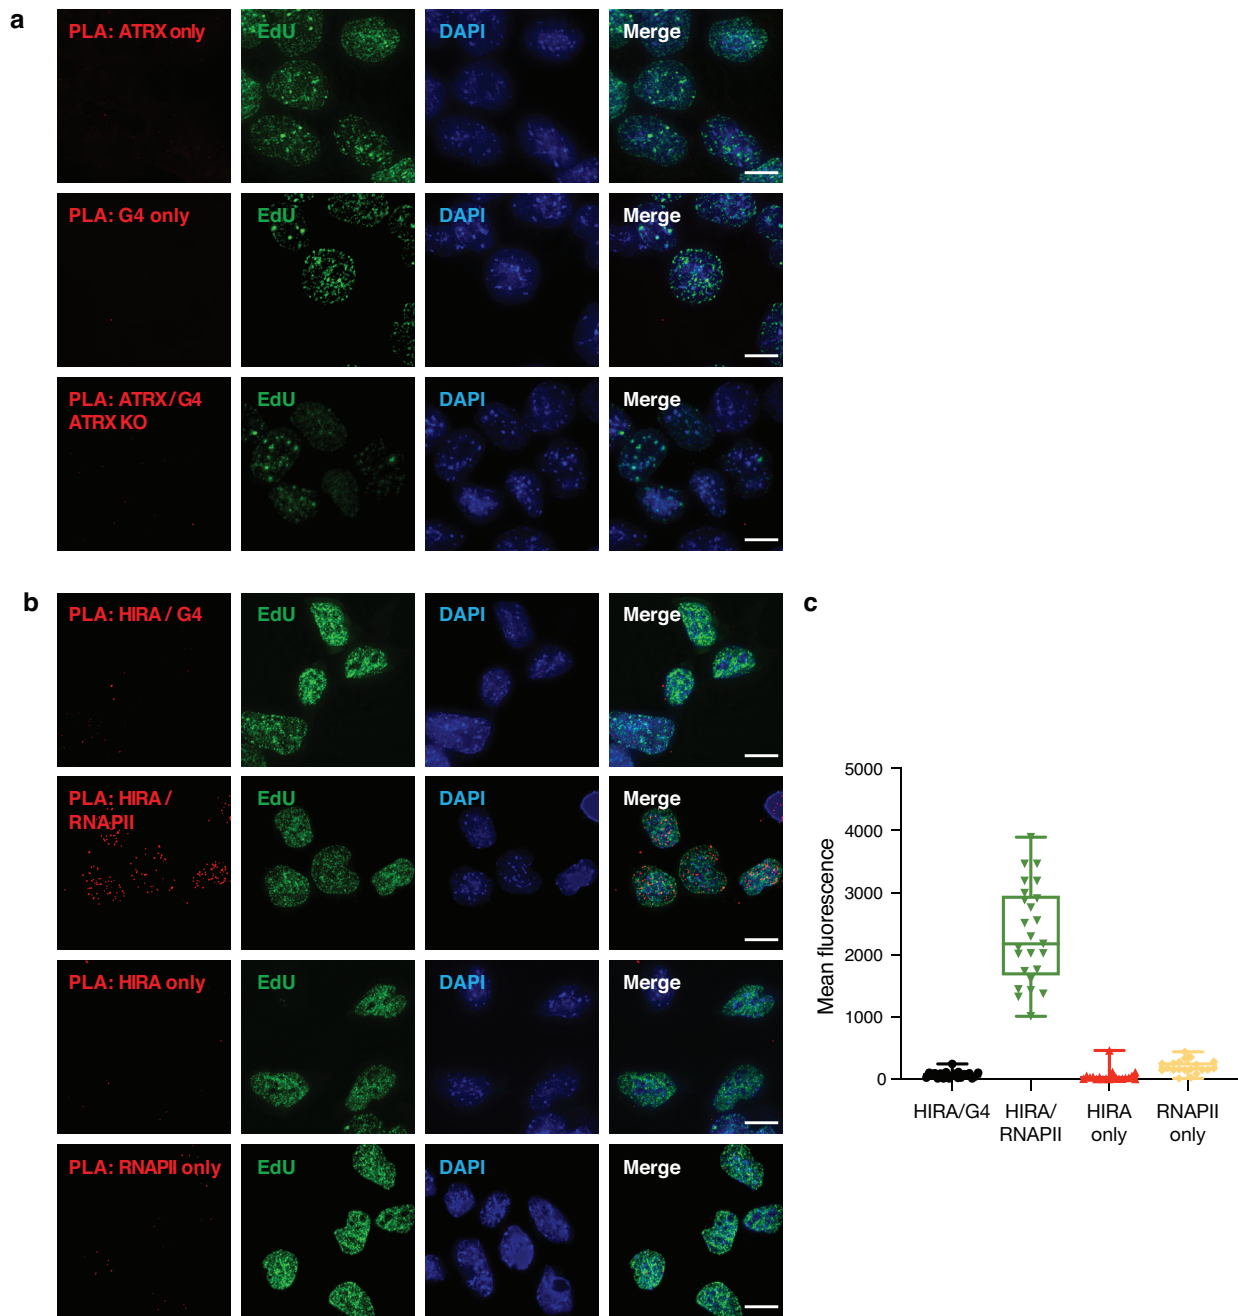

804  
805

806 **Supplementary Figure 3. Negative controls for proximity ligation assay.** Related to Figure  
807 1. (a) Representative images displaying PLA foci when ATRX or BG4 antibody alone was  
808 applied in ESCs (top and middle panels) and when both ATRX and BG4 antibodies were  
809 applied in ATRX KO ESCs (bottom panels). (b) Representative images showing the PLA foci in  
810 ESCs when both HIRA and BG4 antibodies were applied (top panels), when both HIRA and  
811 RNA polymerase II (RNAPII) antibodies were applied (second panels) and when HIRA or  
812 RNAPII antibody alone was applied (third and bottom panels). For a single antibody experiment,

813 all procedures of PLA were described in methods except only one antibody used. HIRA and  
814 RNAPII antibodies used 1:1,000 dilution. Red - PLA foci. Green - EdU-labeling, indicative of  
815 newly synthesized DNA. Blue -DAPI nuclear stain. Scale bar equals 10  $\mu\text{m}$ . (c) Quantification of  
816 signal intensity from PLA foci in ESCs shown in **Supplementary Figure 3b**. HIRA/G4 (n=22),  
817 HIRA/RNAPII (n=25), HIRA only (n=21), and RNAPII only (n=20).  
818  
819

## Teng et al., Supplementary Fig. 4

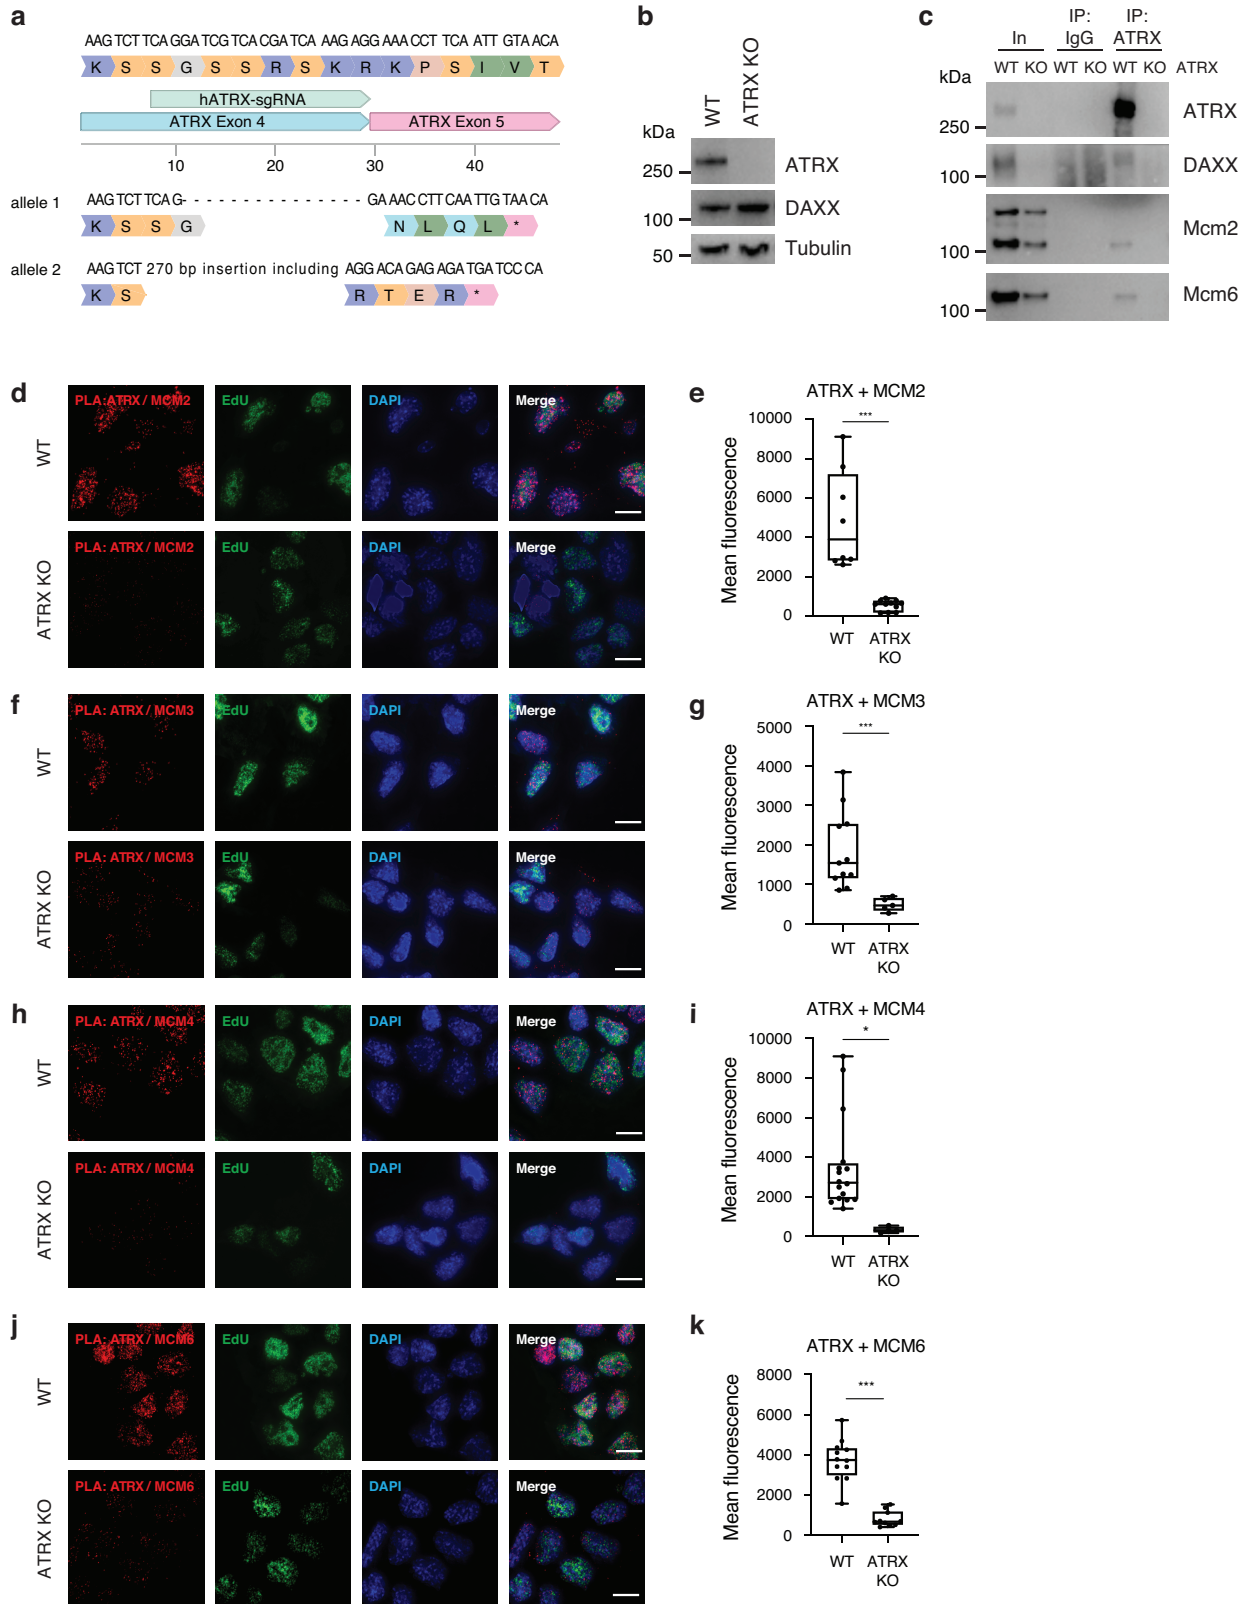

820  
821

822 **Supplementary Figure 4. Validation of interaction between ATRX and MCM proteins.**

823 Related to Figure 2. **(a)** Generation of CRISPR/Cas9 mediated ATRX KO cells. HeLa cells were  
824 transfected with a Cas9 expression plasmid containing an sgRNA targeting exon 4 of the ATRX  
825 gene. A single clone was isolated and validated by Sanger sequencing. **(b)** Immunoblot from  
826 HeLa whole-cell lysates showing the expression of ATRX and DAXX in wild-type and ATRX KO  
827 cells. Tubulin as loading control. **(c)** Co-immunoprecipitation from HeLa nuclear extracts  
828 showing ATRX interaction with DAXX, MCM2 and MCM6. **(d, f, h, and j)** Representative images  
829 demonstrating ATRX and Mcm2, Mcm3, Mcm4, and Mcm6 co-localization by proximity ligation  
830 assay (PLA) in early S phase of wild-type and ATRX KO ESCs. Red - PLA (ATRX-Mcm  
831 proteins). Green - EdU-labeling, indicative of newly synthesized DNA. Blue - DAPI nuclear stain.  
832 Scale bar equals 10  $\mu$ m. **(e, g, i, and k)** Quantification of signal intensity from ATRX-Mcm PLA  
833 foci in early S phase of ESCs in **Supplementary Figure 4d, 4f, 4h, and 4j**. Statistical  
834 significance is determined by Mann-Whitney U-test. \*P < 0.05; \*\*\*P < 0.001. In **(e)**, wild-type  
835 (n=8) and ATRX KO (n=11); In **(g)**, wild-type (n=11) and ATRX KO (n=5); In **(i)**, wild-type (n=16)  
836 and ATRX KO (n=4); In **(k)**, wild-type (n=12) and ATRX KO (n=10).

837

838

## Teng et al., Supplementary Fig. 5

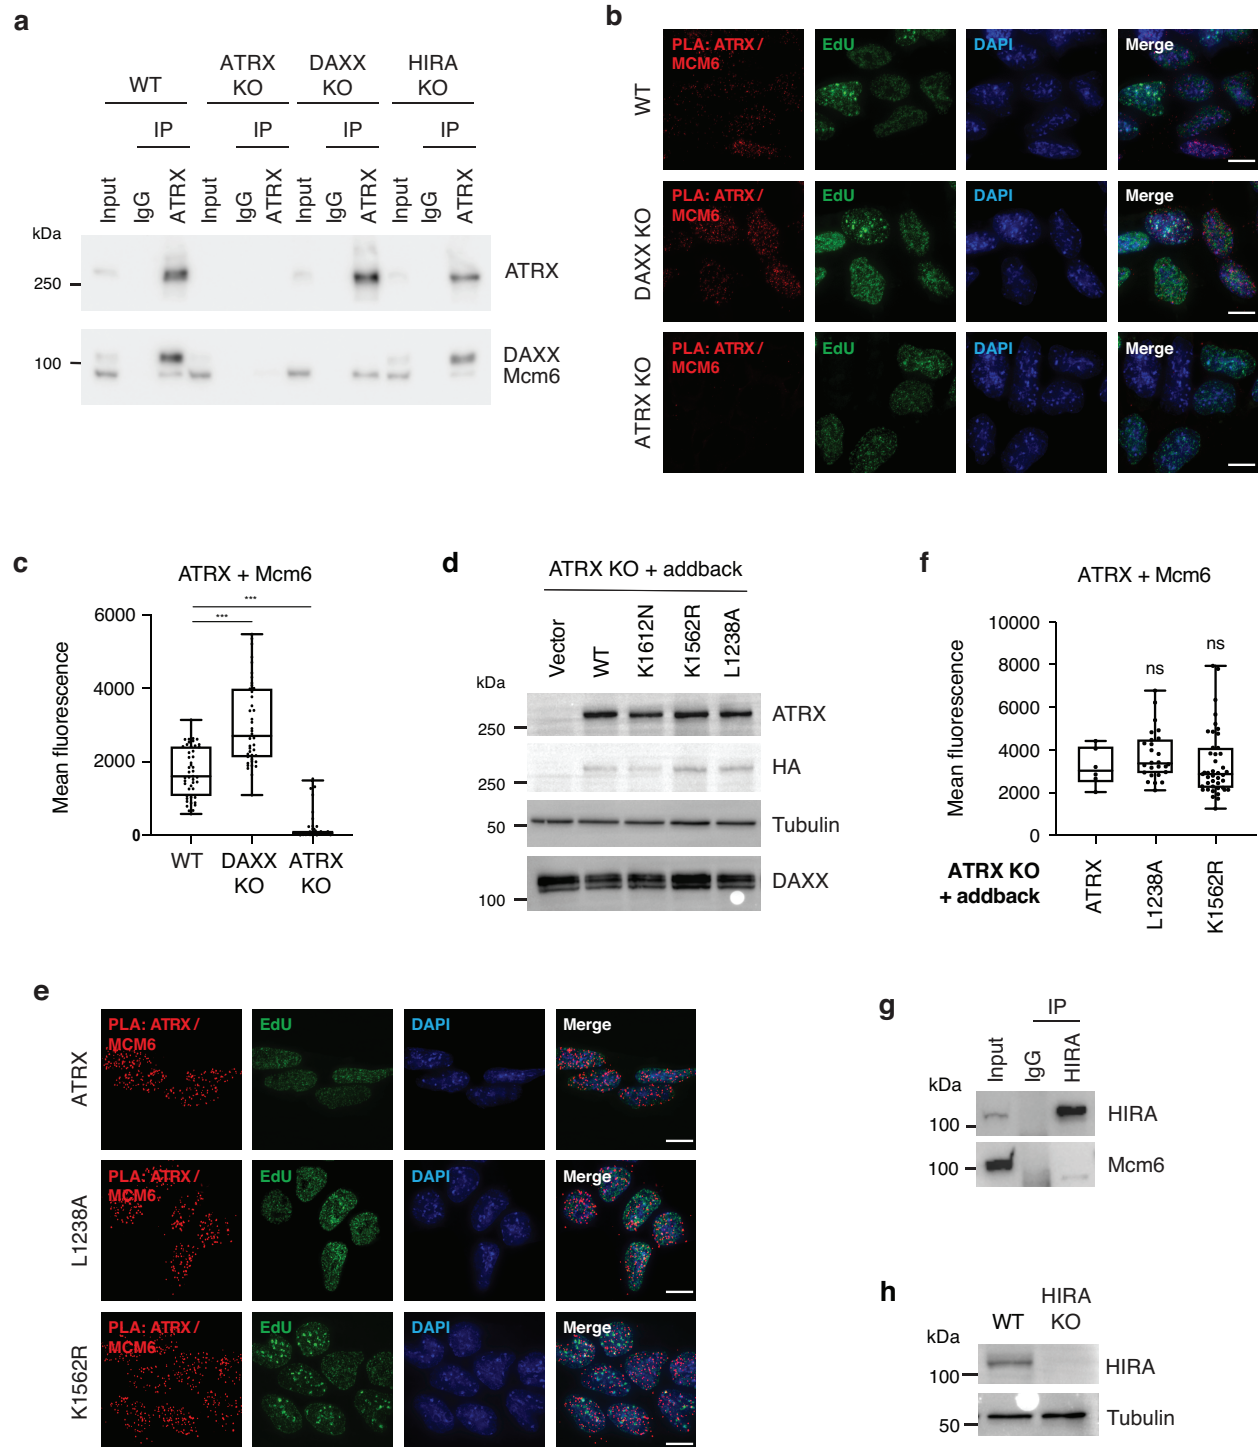

839  
840

841 **Supplementary Figure 5. ATRX-Mcm6 interaction does not require DAXX.** Related to  
842 Figure 2. (a) Co-immunoprecipitation from ESC nuclear extracts showing ATRX interaction with  
843 DAXX and Mcm6 in wild-type, ATRX KO, DAXX KO, and HIRA KO ESCs. (b) Representative  
844 images demonstrating ATRX-Mcm6 co-localization by proximity ligation assay (PLA) in

845 asynchronized wild-type, ATRX KO (n=47), and DAXX KO ESCs (n=42). **(c)** Quantification of  
846 signal intensity from ATRX-Mcm6 PLA foci in **Supplementary Figure 5b**. **(d)** Immunoblot from  
847 ESC whole-cell lysates showing the expression of wild-type and mutants of HA-tagged ATRX in  
848 ATRX KO cells. DAXX expression remains the same within each cell lysate. **(e)** Representative  
849 images demonstrating ATRX-Mcm6 co-localization by proximity ligation assay (PLA) in early S  
850 phase of ATRX KO ESCs that expressing exogenous wild-type ATRX and ATRX mutants  
851 (L1238A and K1562R). **(f)** Quantification of signal intensity from ATRX-Mcm6 PLA foci in  
852 **Supplementary Figure 5e**. ATRX (n=6), L1238A (n=26), and K1562R (n=43). **(g)** Co-  
853 immunoprecipitation from HeLa nuclear extracts showing HIRA does not interact with MCM6.  
854 **(h)** Immunoblot from ESC whole-cell lysates showing the expression of HIRA in wild-type and  
855 HIRA KO cells. For **d** and **h**, tubulin as loading control. For **b** and **e**, Red - PLA (ATRX-Mcm6).  
856 Green - EdU-labeling, indicative of newly synthesized DNA. Blue - DAPI nuclear stain. Scale bar  
857 equals 10  $\mu$ m. Statistical significance determined by One-way ANOVA test. \*\*\*p < 0.001. ns; not  
858 significant.  
859  
860

## Teng et al., Supplementary Fig. 6

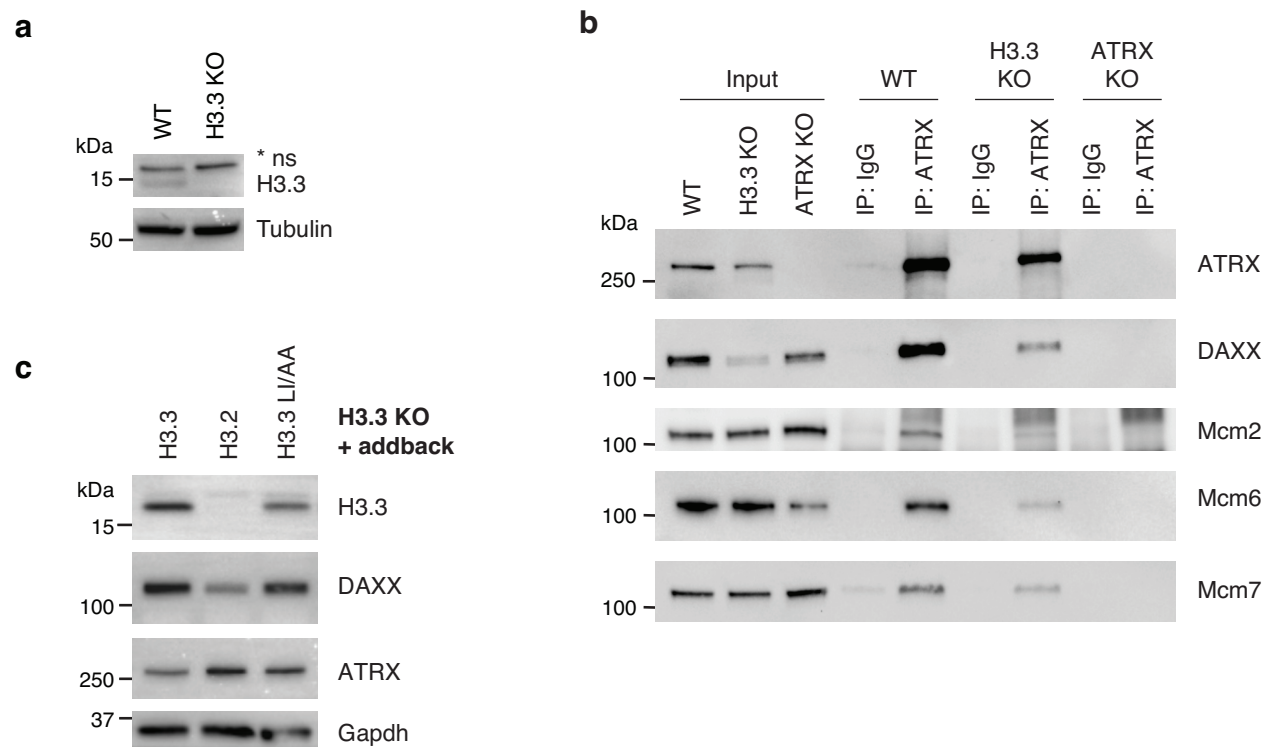

861  
862

863 **Supplementary Figure 6. ATRX-Mcm6 interaction is partially reduced in H3.3 KO.** Related  
864 to Figure 2. **(a)** Immunoblot from ESC whole-cell lysates showing H3.3 expression levels in wild-  
865 type and H3.3 KO cells. ns, non-specific band. **(b)** Co-immunoprecipitation from ESC nuclear  
866 extracts showing ATRX interaction with DAXX, Mcm2, Mcm6 and Mcm7 in wild-type, H3.3 KO,  
867 and ATRX KO cells. **(c)** Immunoblot from ESC whole-cell lysates showing the expression of  
868 H3.3, DAXX, and ATRX in H3.3 KO cells exogenously expressing H3.3, H3.2 or H3.3 L126A  
869 L130A (H3.3 LI/AA). For **a** and **c**, tubulin and Gapdh as loading control.

870  
871

## Teng et al., Supplementary Figure 7

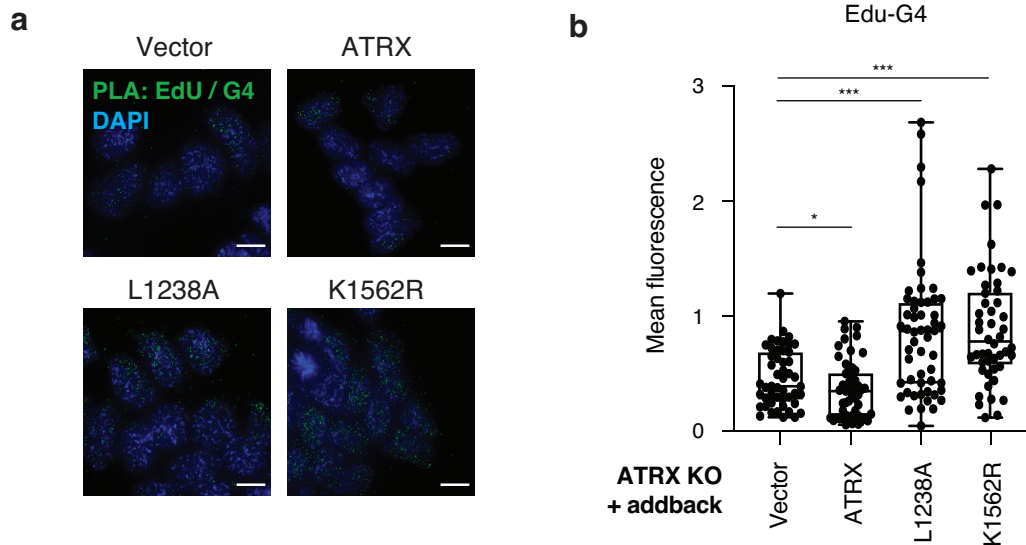

872  
873

874 **Supplementary Figure 7. ATRX requires its helicase and chaperone activity for**  
875 **preventing G4 formation at sites of DNA synthesis.** Related to Figure 3. (a) Representative  
876 images demonstrating EdU and G4 co-localization by proximity ligation assay (PLA) in early S  
877 phase of ATRX KO ESCs exogenously expressing wild-type ATRX (n=53) and ATRX mutants  
878 (L1238A, n=54 and K1562R, n=48). Green - PLA (EdU-G4). Blue - DAPI nuclear stain. Scale  
879 bar equals 10  $\mu$ m. (b) Quantification of signal intensity from EdU-G4 PLA foci in  
880 **Supplementary Figure 7a.** Statistical significance determined by a One-way ANOVA test. \*p <  
881 0.05; \*\*\*p < 0.001.

882  
883



## Teng et al., Supplementary Figure 8

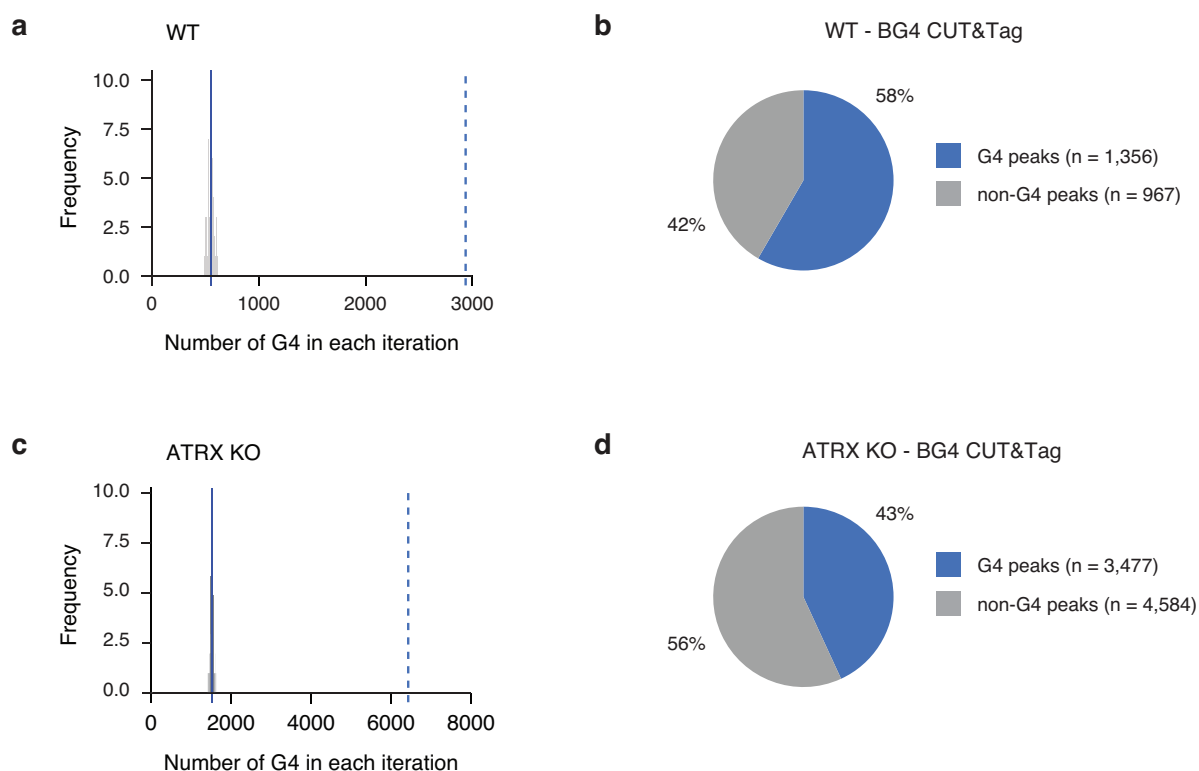

884  
885

886 **Supplementary Figure 8. G4 prediction on observed G4 peaks of CUT&Tag.** Related to  
887 Figure 3. **(a)** The histogram shows the number of G4 motifs in random sequences compared  
888 with the 2,936 observed number of G4 motifs (dashed line) identified in WT ESCs. Simulation  
889 was used to estimate the number of G4 motifs by chance. For 100 times, the peaks were  
890 randomly shuffled throughout the genome while maintaining the number of peaks and their size  
891 and the number of G-quadruplexes computed. On average, 550 G-quadruplexes (sd= 28) (solid  
892 line) were observed therefore the observed number of G-quadruplex motifs is significantly larger  
893 (by 85 standard deviations) than expected by chance. **(b)** BG4 CUT&Tag analysis in WT ESCs.  
894 Pie chart represents the percentage of BG4-enriched regions containing G4 consensus motifs  
895 (1,356/2,323, 58%). **(c)** As described in panel a, but for ATRX KO ESCs. 6,428 G4 motifs were  
896 observed compared to simulation average of 1,511 (sd=45). Observed G4 motifs in ATRX KO  
897 ESCs were 110 standard deviations larger than expected by chance. **(d)** BG4 CUT&Tag  
898 analysis in ATRX KO ESCs. Pie chart represents the percentage of BG4-enriched regions  
899 containing G4 consensus motifs (3,477/8,061, 43%).

900  
901

## Teng et al., Supplementary Figure 9

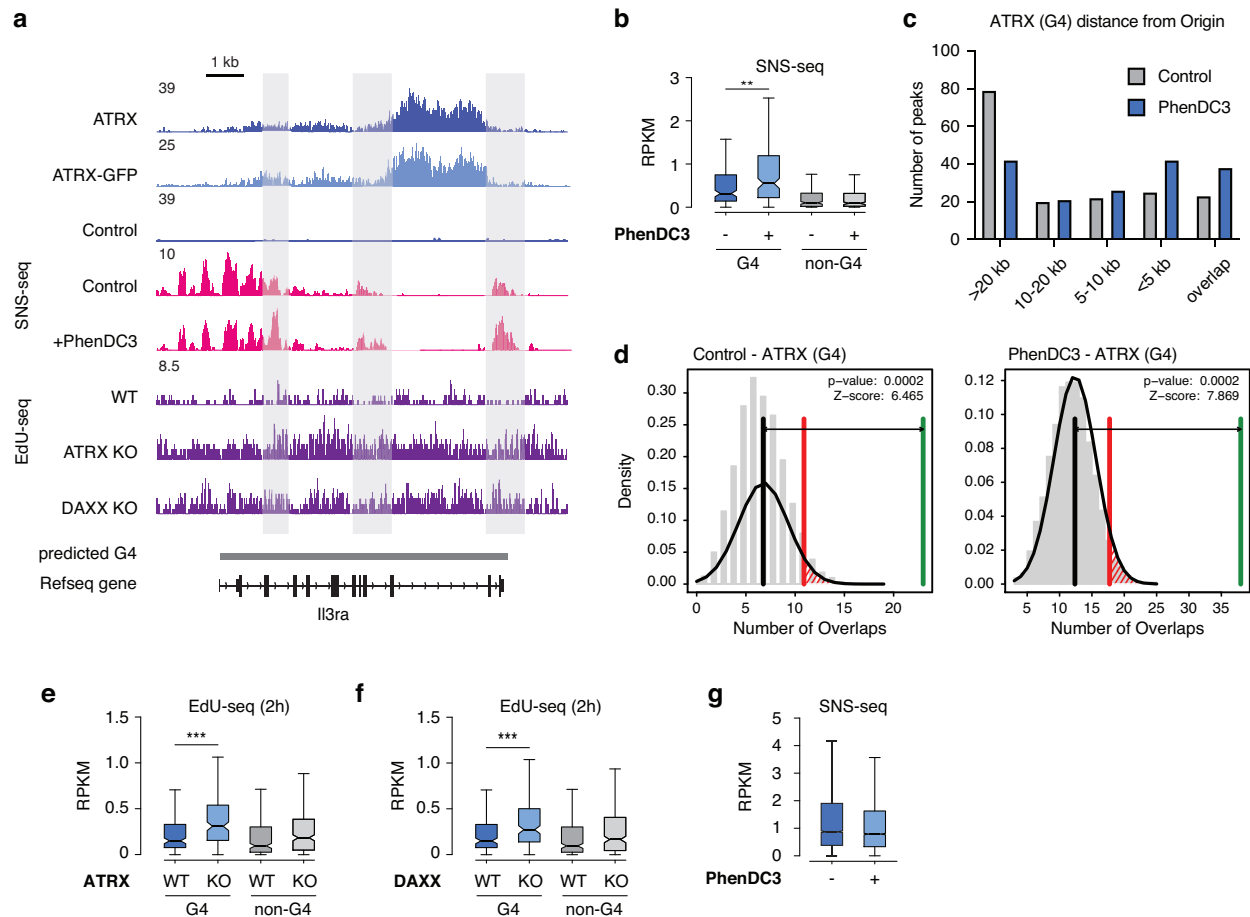

902

903

### 904 **Supplementary Figure 9. Analysis of G4-related DNA synthesis and origin activity.**

905 Related to Figure 3. **(a)** Genome browser representations of ATRX, ATRX-GFP ChIP-seq, SNS-seq, and EdU-seq at predicted G4 regions in ESCs. The SNS-seq in ESCs treated with DMSO (control) or G4 stabilizer PhenDC3 (10  $\mu$ M) for 48h was described previously (Prorok, P. et al. 2019). Data represented as read density in reads per kilobase per million mapped reads

909 (RPKM) normalized to an external standard for each data set. Gray boxes indicate predicted G4 regions. **(b)** Box plots representing SNS-seq (Prorok, P. et al. 2019) in ESCs showing origin enrichment at ATRX-enriched G4 and non-G4 regions in the presence and absence of

911 PhenDC3. **(c)** The distance between ATRX G4 peaks and origins defined in either SNS control or SNS PhenDC3 were determined using bedtools closest. In case of a tie, the first value is

913 reported. The peaks were classified based on the distance to the origin in the following groups: overlap, less than 5kb, 5-10kb, 10-20kb, and more than 20 kb. The x-axis represents the

916 distance category, and the y-axis represents the number of peaks in the particular distance category. **(d)** Statistical analysis of origin overlap shown in panel c. The number of overlaps

918 (origins and ATRX sites) in random sequences compared with the observed number of overlaps (green line) identified in ESCs either control or PhenDC3. Simulation was used to estimate the

919 number of overlaps by chance. For 100 times, the peaks were randomly shuffled throughout the

920

921 genome while maintaining the number of peaks and their size and the number of origins  
922 computed. After simulation, the number of overlaps (black line) were observed and the statistic  
923 was tested at  $\alpha = 0.05$  (red line). **(e and f)** Box plots representing EdU-seq read counts at early  
924 S phase at ATRX-enriched G4 and non-G4 regions in wild-type ESCs compared to **(e)** ATRX  
925 KO and **(f)** DAXX KO ESCs. Data are representative of two independent experiments. **(g)** Box  
926 plots representing SNS-seq read counts in control or PhenDC3-treated ESCs at G4 regions  
927 experimentally identified after ATRX KO. The bottom and the top of the boxes correspond to the  
928 25th and 75th percentiles, and the internal band is the 50th percentile (median). The plot  
929 whiskers correspond to 1.5 interquartile range. Statistical significance determined by Wilcoxon  
930 Mann Whitney test. \*\* $p < 0.01$ ; \*\*\* $p < 0.001$ .

931

932

## Teng et al., Supplementary Fig. 10

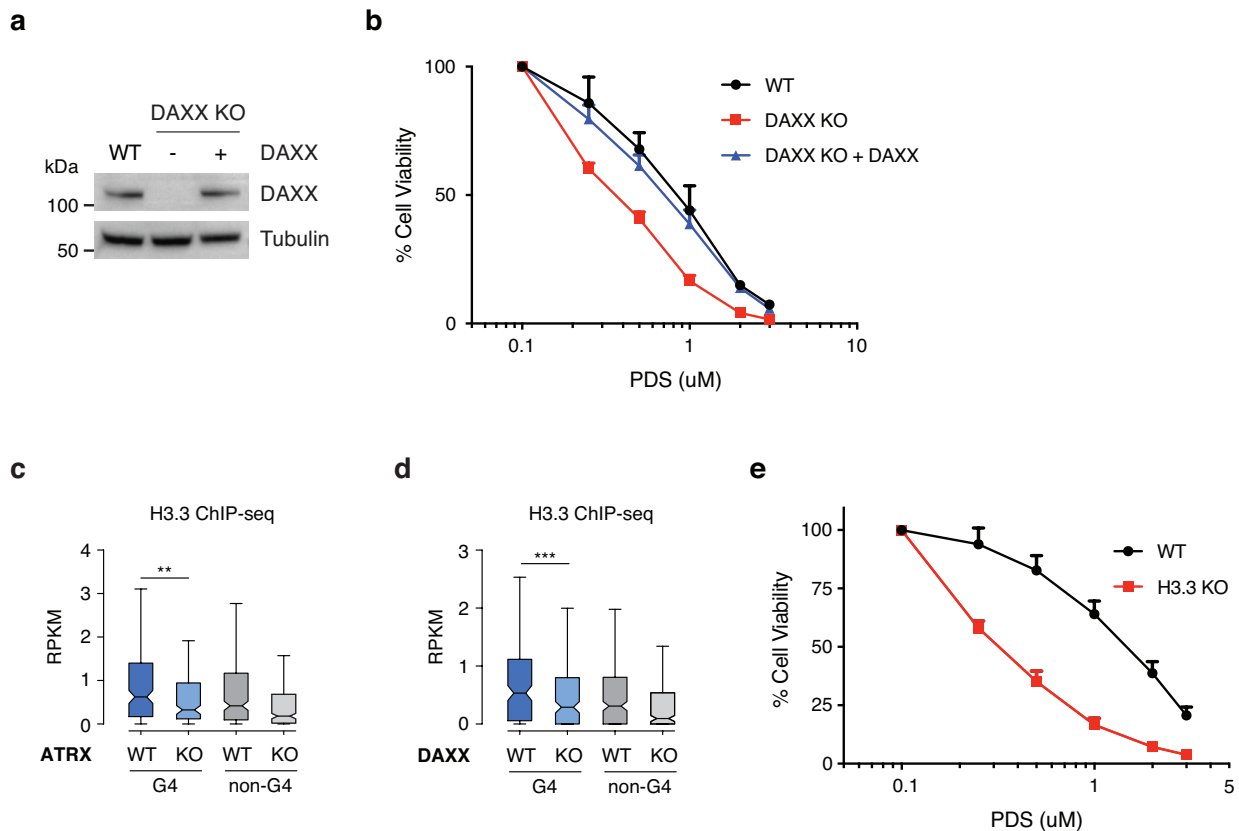

933  
934

935 **Supplementary Figure 10. DAXX KO and H3.3 KO cells are sensitive to the G4 stabilizer,**  
 936 **PDS.** Related to Figure 4. (a) Immunoblot from ESC whole-cell lysates showing the expression  
 937 of DAXX in wild-type ESCs and DAXX KO ESCs with or without exogenous DAXX expression  
 938 constructs. Tubulin as loading control. (b) Cell viability of wild-type, DAXX KO, and DAXX KO  
 939 ESCs expressing exogenous DAXX treated with PDS for 5 days. Data is one independent  
 940 experiment with three technical replicates. (c and d) Box plots representing H3.3 ChIP-seq in  
 941 ESCs<sup>11</sup> at ATRX-enriched G4 and non-G4 regions in wild-type ESCs compared to (c) ATRX KO  
 942 and (d) DAXX KO ESCs. The bottom and the top of the boxes correspond to the 25th and 75th  
 943 percentiles, and the internal band is the 50th percentile (median). The plot whiskers correspond  
 944 to 1.5 interquartile range. Statistical significance is determined by Wilcoxon Mann Whitney test.  
 945 \*\* $p < 0.01$ ; \*\*\* $p < 0.001$ . (e) Cell viability of wild-type and H3.3 KO ESCs treated with PDS for 5  
 946 days. Data are representative of two independent experiments. For b and e, mock-treated cells  
 947 at day 0 were taken as 100% survival. Data represented as mean  $\pm$  SD.

948  
949

## Teng et al., Supplementary Fig. 11

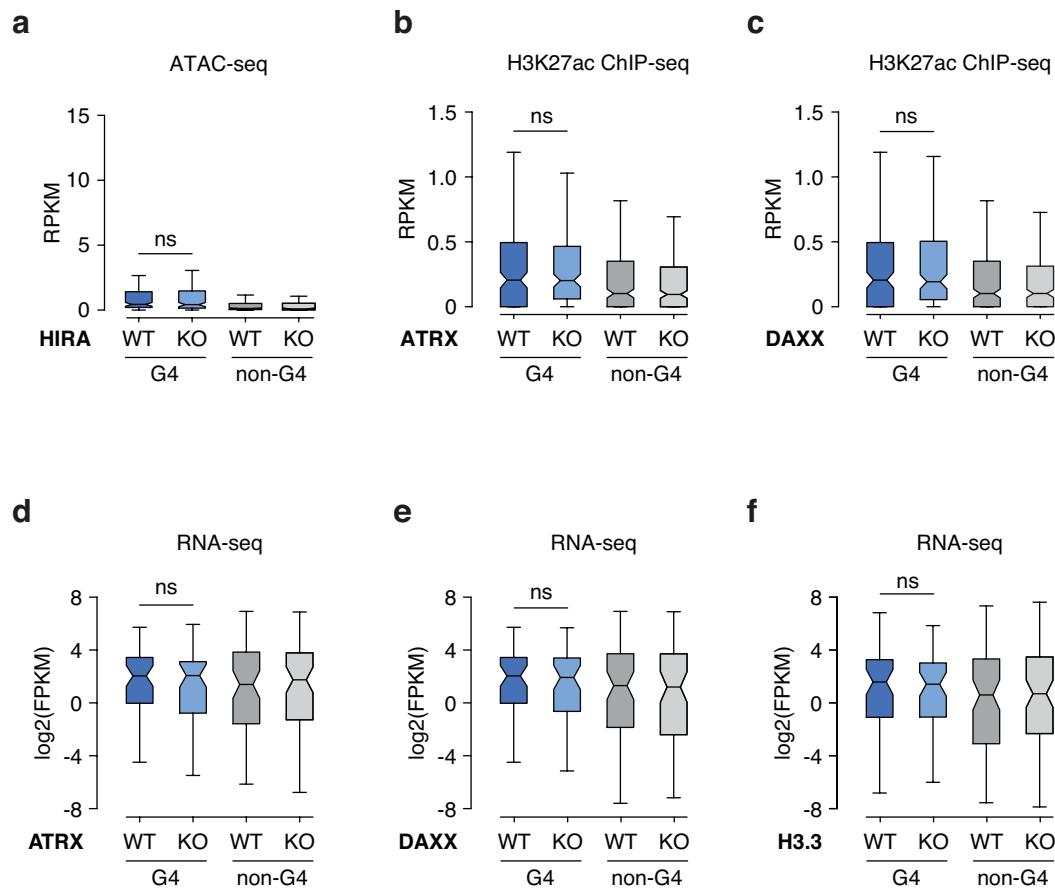

950  
951

**Supplementary Figure 11. ATRX/DAXX complex does not contribute uniformly to transcriptional activity of genes containing ATRX-enriched G4 regions.** Related to Figure 5. (a) Box plots representing ATAC-seq read counts at ATRX-enriched G4 and non-G4 regions in wild-type ESCs compared to HIRA KO ESCs. (b and c) Box plots representing ChIP-seq read counts for H3K27ac<sup>60</sup> at ATRX-enriched G4 and non-G4 regions in wild-type ESCs compared to (b) ATRX KO and (c) DAXX KO cells. (d, e, and f) Box plots representing RNA-seq demonstrate that expression from ATRX-enriched G4 and non-G4 genes does not change in (d) ATRX KO (n=58), (e) DAXX KO (n=56), and (f) H3.3 KO ESCs (n=62), compared to wild-type ESCs<sup>60</sup>. Genic ATRX peak defined as within -3kb to +15kb from promoter (n=69). The bottom and the top of the boxes correspond to the 25th and 75th percentiles, and the internal band is the 50th percentile (median). The plot whiskers correspond to 1.5 interquartile range. Statistical significance is determined by Wilcoxon Mann Whitney test. ns, not significant.

964  
965

## Teng et al., Supplementary Fig. 12

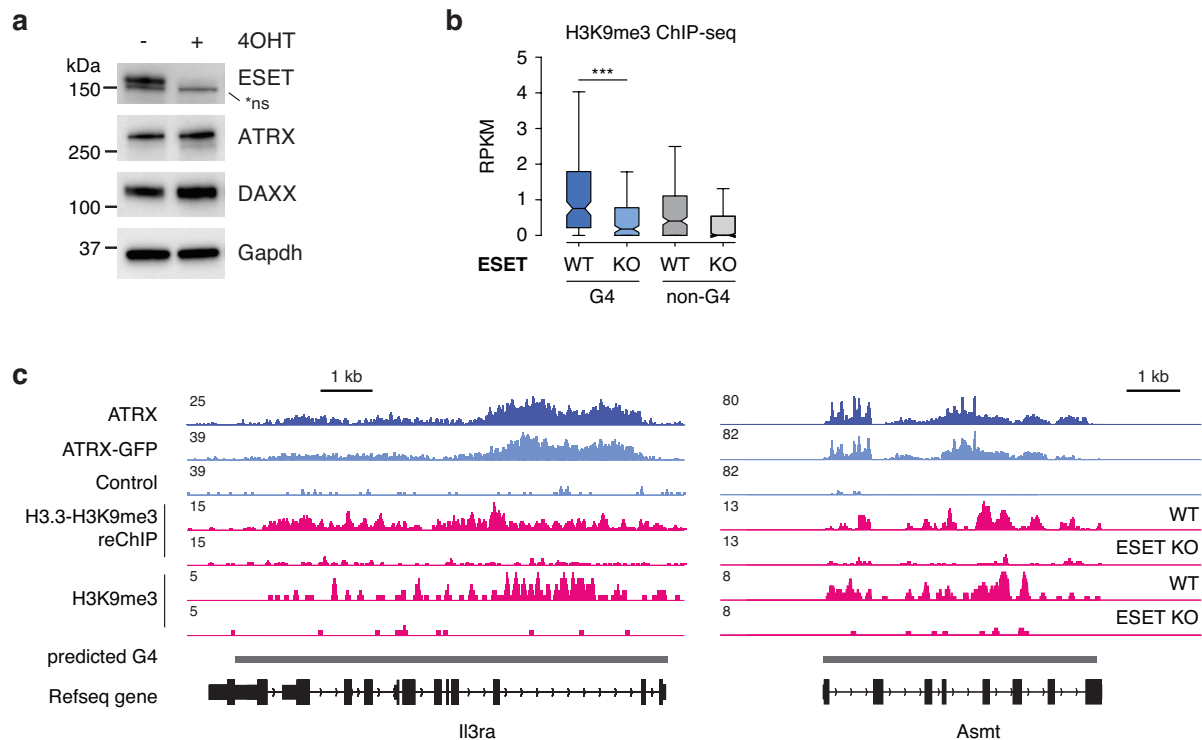

966  
967

968 **Supplementary Figure 12. ESET-mediated heterochromatin formation at ATRX-enriched**  
 969 **G4 regions.** Related to Figure 7. (a) Immunoblot from ESC whole-cell lysates showing the  
 970 expression of ESET, ATRX, and DAXX in wild-type and ESET KO (+ 4OHT) ESCs. Gapdh as  
 971 loading control. (b) Box plots representing ChIP-seq read counts for H3K9me3<sup>69</sup> at ATRX-  
 972 enriched G4 and non-G4 regions in wild-type ESCs compared to ESET KO cells. The bottom  
 973 and the top of the boxes correspond to the 25th and 75th percentiles, and the internal band is  
 974 the 50th percentile (median). The plot whiskers correspond to 1.5 interquartile range. Statistical  
 975 significance is determined by Wilcoxon Mann Whitney test. \*\*\* $p < 0.001$ . (c) Genome browser  
 976 representations of ATRX, ATRX-GFP, H3K9me3 ChIP-seq<sup>69</sup> and H3.3-H3K9me3 reChIP-seq<sup>11</sup>  
 977 at predicted G4 regions in ESCs.

978  
979

## Teng et al., Supplementary Figure 13

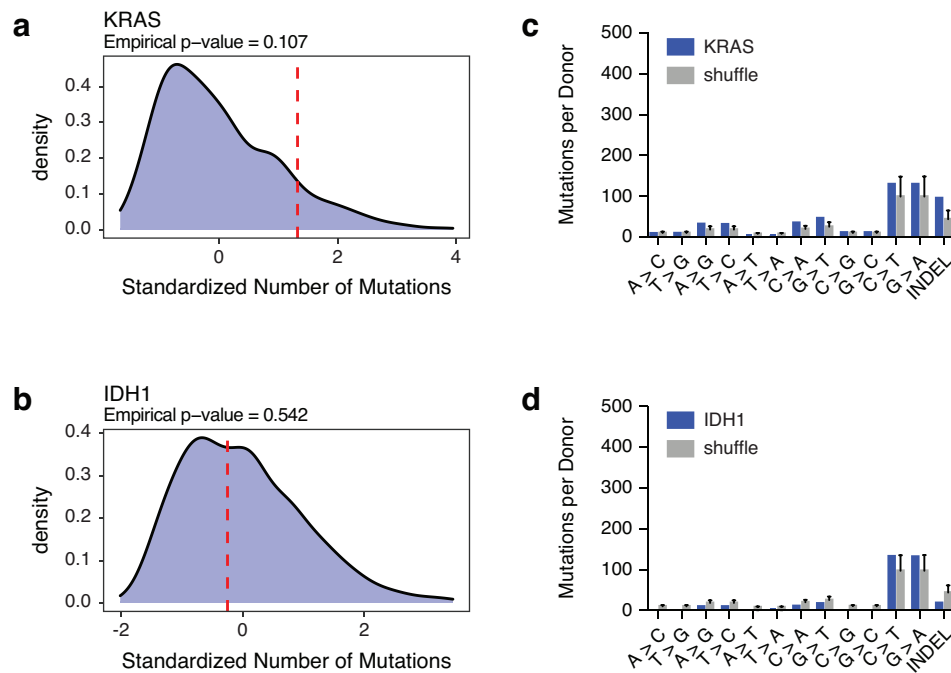

980  
981

**Supplementary Figure 13. Mutations at G4 regions are not correlated with KRAS or IDH1 mutations in human tumors.** Related to Figure 8. **(a and b)** Red line shows standardized number of mutations at G4 regions in KRAS **(a)** or IDH1 **(b)** mutant tumors. Histograms show the mutation density at observed G4 regions in an iteratively and randomly selected patient cohort of the same size. **(c and d)** Analysis of single-nucleotide mutations and insertion-deletion (INDEL) mutations in the KRAS **(c)** or IDH1 **(d)** mutant tumors compared with the shuffled patient cohort described above.

989

### Supplementary Tables

991

**Supplementary Table 1.** List of ATRX-bound G4 and ATRX-bound non-G4 regions.

992

**Supplementary Table 2.** List of ATRX-interacting proteins in HeLa WT and ATRX KO cells.

993

**Supplementary Table 3.** List of published genomic data sets analyzed in this study.

994

**Supplementary Table 4.** List of antibodies used in this study.

995

**Supplementary Table 5.** List of primers used in H3K9me3 ChIP.

996

### Supplementary Methods

997

**Antibodies.** All antibodies used in this study are listed in Supplementary Table 4.

998

**Immunoblot.** Cell lysates were generated using digestion buffer (50 mM Tris-HCl, pH 7.6, 1 mM CaCl<sub>2</sub>, 0.2% Triton X-100 and protease inhibitor cocktail (Roche)) with micrococcal nuclease for 5min at 37°C and denatured in SDS loading buffer. 1.5 x 10<sup>4</sup> cell lysates were run on NuPAGE 4-12% Bis-Tris gel at 180V. Then, the protein on the gel was transferred onto a

1000

1001

1002

1003

1004 PVDF membrane (Millipore). The membrane was incubated with antibodies in 5% milk/TBST  
1005 (0.1% Tween 20) overnight at 4°C, washed, incubated with secondary antibody and developed  
1006 on the ChemiDoc MP camera system (Bio-Rad). Blot is representative of three independent  
1007 experiments.

1008 **Cell cycle profiling in ESCs.** Cell cycle phase analysis was performed using the Click-iT EdU  
1009 Alexa Fluor 488 Flow Cytometry Assay kit (Thermo Fisher, C10425) according to the  
1010 manufacturer's instructions. ESCs were grown overnight in a plate. Cells were incubated in  
1011 medium with 2 mM thymidine for 14h, washed, and incubated in medium with 50 ngml<sup>-1</sup>  
1012 nocodazole for 7h<sup>62</sup>. After wash, mitotic cells were labeled with 10 μM EdU for 30 min prior to  
1013 fixation. 1x 10<sup>6</sup> cells were trypsinized, washed with 1% BSA/PBS, fixed with Click-it fixative,  
1014 permeabilized with Click-it saponin-based permeabilization and wash reagent and incubated  
1015 with Click-it reaction (see kit manual). Cells were washed and resuspended in Click-it saponin-  
1016 based permeabilization and wash reagent with 2 drops of SYTOX AADvanced™ Ready Flow  
1017 Reagent™ (Thermo Fisher, R37173). Flow cytometry performed on a BD FACSCanto™ II (BD  
1018 Biosciences). SYTOX AADvanced dye fluorescence was excited by 488 nm laser light and  
1019 detected in the far red range of the spectrum. Alexa Fluor 488 fluorescence was excited by 488  
1020 nm laser light and detected in the green range of the spectrum. Cell cycle analysis was  
1021 performed using FlowJo software.

1022 **Proximity ligation assay (PLA).** Cells were seeded on 8 μgml<sup>-1</sup> fibronectin-coated round cover  
1023 glass on a 12-well plate. Cell cycle synchronization was performed as previously described<sup>62</sup>.  
1024 Cells were incubated with 2 mM thymidine for 14h and following 50 ngml<sup>-1</sup> nocodazole treatment  
1025 for 7h. Mitotic cells were released and incubated with 2 μM EdU for 20min in prior to time point.  
1026 Cells were fixed with 4% paraformaldehyde in PBS pH 7.4 for 10min at room temperature then  
1027 permeabilized in 0.5% Triton X-100 in PBS for 15min.

1028 *For ATRX and MCM foci*, cells were fixed and permeabilized as described previously. Click-iT  
1029 reaction and 488-azide were used for detection of EdU-labeling cells. PLA was the same as  
1030 described previously but using ATRX (ab97508, 1:2500) and Mcm (1:2500) antibodies.

1031 **Chromatin immunoprecipitation.** Crosslinking ChIP was performed according to published  
1032 methods<sup>2,63</sup>. Cells were fixed with 2 mM EGS (Thermo Fisher, 21565) for 45min at room  
1033 temperature, 1% paraformaldehyde for 10min and quenched with 0.125 M glycine. Lysate was  
1034 sonicated in lysis buffer (1% SDS, 10 mM EDTA, 50 mM Tris, pH 8 and protease inhibitor  
1035 cocktail) to get 150-500 bp chromatin using a Covaris M220 Focused-ultrasonicator and were  
1036 immunoprecipitated with ATRX antibody or GFP antibody bound to Dynabeads Protein G  
1037 overnight at 4°C, with 5% kept as input DNA. Magnetic beads were washed, chromatin was  
1038 eluted and ChIP DNA was purified by Qiagen PCR purification column. Native ChIP was  
1039 performed according to published methods<sup>11</sup>. Cells were collected, washed, and lysed in  
1040 digestion buffer (50 mM Tris, pH 7.4, 1mM CaCl<sub>2</sub>, 0.2% Triton X-100, and protease inhibitor  
1041 cocktail) with micrococcal nuclease for 5min at 37°C. Nuclei were sonicated briefly and dialyzed  
1042 into RIPA buffer (10 mM Tris, pH 7.6, 1 mM EDTA, 0.1% SDS, 0.1% Na-deoxycholate, 1%  
1043 Triton X-100) for 2h at 4°C. Soluble materials containing mono- to tri-nucleosomes were  
1044 incubated with H3K9me3 antibody bound to Dynabeads Protein G overnight at 4°C, with 5%



1045 kept as input DNA. Magnetic beads were washed, chromatin was eluted and ChIP DNA was  
1046 purified by Qiagen PCR purification column. The Spike-in chromatin (Active Motif, 53083) and  
1047 Spike-in antibody were used in all ChIP experiments according to the manufacturer's  
1048 instructions.

1049 **ChIP-qPCR.** qPCR was performed in triplicate using a LightCycler 480 Instrument II system and  
1050 Power SYBR Green PCR master mix. ChIP DNA samples were diluted 1:100 in water, with 5  $\mu$ l  
1051 used per reaction. ChIP-qPCR signal is represented as percent input. All qPCR primer  
1052 sequences used in this study are listed in Supplementary Table 5.

1053 **ATAC-seq.** ATAC-seq was performed as previously described<sup>64</sup>. Cells were collected, washed  
1054 and lysed in lysis buffer (10 mM Tris, pH 7.4, 10 mM NaCl, 3 mM MgCl<sub>2</sub>, and 0.1%NP-40).  
1055 Nuclei were collected and subjected to transposase reaction cocktail (25  $\mu$ l 2X TD buffer, 2.5  $\mu$ l  
1056 transposase (Illumina) and 22.5  $\mu$ l nuclease-free water) at 37°C for 30min. DNA was  
1057 immediately collected using Qiagen MinElute kit and eluted in 10 mM Tris, pH 8. Eluted DNA  
1058 was amplified using a KAPA non-hot-start PCR kit with Nextera PCR primer 1 and 2. Libraries  
1059 were amplified no more than 11 cycles and purified using AMPure XP beads. The quality of  
1060 libraries was determined using a D5000 ScreenTape on a 2200 TapeStation and a Qubit  
1061 dsDNA HS Assay kit. Libraries were paired-end 33-base sequenced on the Illumina NextSeq  
1062 500. Typical sequencing depth was at least 40 million reads per sample.

1063 **Analysis of ATAC-seq data.** Quality of the ATAC-seq data sets was assessed using the  
1064 FastQC tool (v.0.11.2). The ATAC-seq reads were then aligned to the mouse reference genome  
1065 (mm10) using BWA (v.0.7.5). For unique alignments, duplicate reads were filtered out. The  
1066 resulting uniquely mapped reads were normalized to the same read depth across all samples  
1067 and converted into bigWig files using BEDTools (v.2.29.0) and then converted to bigwig using  
1068 bedGraphToBigWig utility of UCSC kent tools (v317) for visualization in Integrative Genomics  
1069 Viewer (v.2.3).

1070 **CUT&Tag.** CUT&Tag was performed as previously described<sup>65</sup>. Cells were collected, washed  
1071 and lysed in nuclear extraction buffer (20 mM HEPES-KOH, pH 7.9, 10 mM KCl, 0.1% Triton X-  
1072 100, 20% glycerol, 0.5 mM spermidine, and proteinase inhibitor cocktail) on ice for 10min. While  
1073 cells were lysed, concanavalin A coated magnetic beads (Epiccypher, 21-1401) were activated in  
1074 binding buffer (20 mM HEPES-KOH, pH 7.9, 10 mM KCl, 1 mM CaCl<sub>2</sub>, and 1 mM MnCl<sub>2</sub>). 5 x  
1075 10<sup>5</sup> nuclei per sample were washed with PBS once, resuspended in 100  $\mu$ l wash buffer (20 mM  
1076 HEPES-KOH, pH 7.5, 150 mM NaCl, 0.5 mM spermidine, and proteinase inhibitor cocktail) and  
1077 incubated with 10  $\mu$ l activated beads for 10min at room temperature. Nuclei-bound beads were  
1078 resuspended in 50  $\mu$ l antibody buffer (2 mM EDTA and 0.1% BSA in wash buffer) containing 2  
1079  $\mu$ l BG4 antibody and incubated at 4°C overnight. Unbound antibodies were removed and beads  
1080 were resuspended in 50  $\mu$ l antibody buffer containing 1  $\mu$ l anti-DYKDDDK antibody and  
1081 incubated at room temperature for 2h. After removing unbound antibodies, beads were  
1082 resuspended in 100  $\mu$ l wash buffer containing 1  $\mu$ l anti-rabbit secondary antibody and incubated  
1083 at room temperature for 30min. Beads were washed in 1 ml wash buffer three times,  
1084 resuspended in 100  $\mu$ l wash-300 buffer (20 mM HEPES-KOH, pH 7.5, 300 mM NaCl, 0.5 mM  
1085 spermidine, and proteinase inhibitor cocktail) containing 2.5  $\mu$ l pAG-Tn5 (Epiccypher, 15-1017)

1086 and incubated at room temperature for 1h. Beads were washed in 1 ml wash-300 buffer three  
1087 times to remove unbound pAG-Tn5. Next, beads were resuspended in 300 µl tagmentation  
1088 buffer (10 mM MgCl<sub>2</sub> in wash-300 buffer) and incubated at 37°C for 1h. To stop tagmentation,  
1089 10 µl of 0.5 M EDTA, 3 µl of 10% SDS, and 2.5 µl of Proteinase K were added to 300 µl of  
1090 sample, which was incubated at 55°C for 1h. To extract DNA, samples were transferred to  
1091 Phase Lock Gel tube (QuantaBio, 2302820) and equal volume of Phenol:Chloroform:Isoamyl  
1092 Alcohol was added into the tube and spin at 13000 rpm for 5min. Supernatant containing DNA  
1093 was precipitated in 2.5 volumes of absolute alcohol and incubated at -20°C for 30min to  
1094 overnight. DNA was pelleted after centrifuge and dissolved in 25 µl 0.1x TE. To amplify libraries,  
1095 DNA was amplified using a KAPA non-hot-start PCR kit with Nextera PCR primer 1 and 2.  
1096 Libraries were amplified for 12 cycles and purified using AMPure XP beads. The quality of  
1097 libraries was determined using a D5000 ScreenTape on a 2200 TapeStation and a Qubit  
1098 dsDNA HS Assay kit. Libraries were paired-end 33-base sequenced on the Illumina NextSeq  
1099 500. Typical sequencing depth was at least 100 million reads per sample.

1100 **Analysis of CUT&Tag data.** CUT&Tag was analyzed following the methods available at  
1101 [https://yehengstat.github.io/CUTTag\\_tutorial/](https://yehengstat.github.io/CUTTag_tutorial/). Briefly, quality of CUT&Tag data sets was  
1102 assessed using the FACTQC tool (v.0.11.2). CUT&Tag raw reads were trimmed using  
1103 TrimGalore(v.0.6.4). The trimmed reads were aligned to the mouse reference genome (mm10)  
1104 using BOWTIE2 (v.2.3.2). The optical duplicate reads were filtered using the MarkDuplicates  
1105 tool of Picard (v.2.10.3). The resulting uniquely mapped reads were normalized to the same  
1106 read depth across all samples. Reads were converted into bedgraph files using BEDTools  
1107 (v.2.29.0) and the. Converted to bigwig using bedGraphToBigWig utility of UCSC kent tools  
1108 (v317) for visualization in Integrative Genomics Viewer (v.2.3).

1109 **EdU-seq.** EdU-seq was performed as previously described<sup>73</sup>. Mitotic ESCs were released in  
1110 medium and incubated in medium with 10 µM EdU for 30min before the cells were collected. At  
1111 the indicated time, cells were washed and immediately fixed with cold 90% methanol overnight  
1112 at -20°C. Cells were permeabilized with 0.2% Triton X-100 in PBS for 30min at room  
1113 temperature. After washing, EdU was coupled to a cleavable biotin-azide (Azide-SS-biotin,  
1114 BroadPharm, BP-22877) using the Click-iT reaction cocktail (Thermo Fisher, C10269). The DNA  
1115 was purified by phenol/chloroform extraction in Phase Lock Gel, Light, 1.5-ml tube and ethanol  
1116 precipitation for EdU-labeled DNA isolation. Total 15 µg DNA was sonicated to a size range of  
1117 150-500 bp with a Covaris M220 Focused-ultrasonicator. EdU-labeled DNA fragments were  
1118 pulled down by Dynabeads MyOne streptavidin C1 (Invitrogen) for 15min at room temperature,  
1119 washed, and eluted in elution solution (10 mM Tris, pH 8) containing fresh 2% β-  
1120 mercaptoethanol for 1h at room temperature. The eluted DNA was directly used for library  
1121 preparation. Asynchronized EdU-labeled HeLa DNA fragments were generated as described  
1122 previously for a spike-in normalization and used in EdU-seq. The EdU-seq libraries were  
1123 prepared from 5 ng DNA following the Illumina TruSeq protocol. The quality of libraries was  
1124 determined using a D5000 ScreenTape on a 2200 TapeStation and a Qubit dsDNA HS Assay  
1125 kit. Libraries were paired-end 33-base sequenced on the Illumina NextSeq 500. Typical  
1126 sequencing depth was at least 50 million reads per sample.

1127 **Analysis of EdU-seq data.** Quality of EdU-seq data sets was assessed using the FastQC tool  
1128 (v.0.11.2). EdU-seq raw reads were aligned separately to the mouse reference genome (mm10)  
1129 and the spike-in human reference genome (hg19) using BOWTIE2 (v.2.2.8). Only one alignment  
1130 is reported for each read (either the single best alignment or, if more than one equivalent best  
1131 alignment was found, one of those matches selected randomly). Duplicate reads were filtered  
1132 using the MarkDuplicates tool of Picard (v.1.127). The resulting uniquely mapped reads were  
1133 normalized to the same read depth across all samples. Reads were converted into bedgraph  
1134 files using BEDTools (v.2.29.0) and then converted to bigwig using bedGraphToBigWig utility of  
1135 UCSC kent tools (v317) for visualization in Integrative Genomics Viewer (v.2.3).

1136 **Analysis of SNS-seq data.** Quality of SNS-seq data sets was assessed using the FastQC tool  
1137 (v.0.11.2). SNS-seq raw reads were aligned to the mouse reference genome (mm10) using  
1138 BOWTIE2 (v.2.2.8). Only one alignment is reported for each read (either the single best  
1139 alignment or, if more than one equivalent best alignment was found, one of those matches  
1140 selected randomly). Duplicate reads were filtered using the MarkDuplicates tool of Picard  
1141 (v.1.127). The resulting uniquely mapped reads were normalized to the same read depth across  
1142 all samples. Reads were converted into bedgraph files using BEDTools (v.2.29.0) and then  
1143 converted to bigwig using bedGraphToBigWig utility of UCSC kent tools (v317) for visualization  
1144 in Integrative Genomics Viewer (v.2.3).

1145 **Analysis of RNA-seq data.** Quality of the RNA-seq raw reads was assessed using the FastQC  
1146 tool (v.0.11.2). The reads were then aligned to the mouse reference genome (mm10) using the  
1147 spliced read aligner TopHat version v.2.0.12, transcriptome assembly was carried out using  
1148 Cufflinks v.2.2.1 with default parameters, filtered transcripts were merged into distinct  
1149 nonoverlapping sets using Cuffmerge, and Cuffdiff was used to calculate the differential  
1150 expression genes between the conditions.

1151

1152 **REFERENCES**

- 1153 1. Dyer, M. A., Qadeer, Z. A., Valle-Garcia, D. & Bernstein, E. ATRX and DAXX: Mechanisms  
1154 and Mutations. *Cold Spring Harb. Perspect. Med.* **7**, (2017).
- 1155 2. Law, M. J. *et al.* ATR-X syndrome protein targets tandem repeats and influences allele-  
1156 specific expression in a size-dependent manner. *Cell* **143**, 367–378 (2010).
- 1157 3. Sadic, D. *et al.* Atrx promotes heterochromatin formation at retrotransposons. *EMBO*  
1158 *reports* vol. 16 836–850 (2015).
- 1159 4. He, Q. *et al.* The Daxx/Atrx Complex Protects Tandem Repetitive Elements during DNA  
1160 Hypomethylation by Promoting H3K9 Trimethylation. *Cell Stem Cell* **17**, 273–286 (2015).
- 1161 5. Voon, H. P. J. *et al.* ATRX Plays a Key Role in Maintaining Silencing at Interstitial  
1162 Heterochromatic Loci and Imprinted Genes. *Cell Reports* vol. 11 405–418 (2015).
- 1163 6. Udugama, M. *et al.* Ribosomal DNA copy loss and repeat instability in ATRX-mutated  
1164 cancers. *Proc. Natl. Acad. Sci. U. S. A.* **115**, 4737–4742 (2018).
- 1165 7. Sarma, K. *et al.* ATRX directs binding of PRC2 to Xist RNA and Polycomb targets. *Cell* **159**,  
1166 869–883 (2014).
- 1167 8. Danussi, C. *et al.* Atrx inactivation drives disease-defining phenotypes in glioma cells of  
1168 origin through global epigenomic remodeling. *Nat. Commun.* **9**, 1057 (2018).
- 1169 9. Goldberg, A. D. *et al.* Distinct factors control histone variant H3.3 localization at specific  
1170 genomic regions. *Cell* **140**, 678–691 (2010).
- 1171 10. Navarro, C., Lyu, J., Katsori, A.-M., Caridha, R. & Elsässer, S. J. An embryonic stem cell-  
1172 specific heterochromatin state promotes core histone exchange in the absence of DNA  
1173 accessibility. *Nat. Commun.* **11**, 5095 (2020).
- 1174 11. Elsässer, S. J., Noh, K.-M., Diaz, N., Allis, C. D. & Banaszynski, L. A. Histone H3.3 is  
1175 required for endogenous retroviral element silencing in embryonic stem cells. *Nature* **522**,  
1176 240–244 (2015).
- 1177 12. Li, F. *et al.* ATRX loss induces telomere dysfunction and necessitates induction of  
1178 alternative lengthening of telomeres during human cell immortalization. *The EMBO Journal*  
1179 vol. 38 (2019).
- 1180 13. Wong, L. H. *et al.* ATRX interacts with H3.3 in maintaining telomere structural integrity in  
1181 pluripotent embryonic stem cells. *Genome Research* vol. 20 351–360 (2010).
- 1182 14. Clynes, D. *et al.* ATRX Dysfunction Induces Replication Defects in Primary Mouse Cells.  
1183 *PLoS ONE* vol. 9 e92915 (2014).
- 1184 15. Clynes, D. *et al.* Suppression of the alternative lengthening of telomere pathway by the  
1185 chromatin remodelling factor ATRX. *Nature Communications* vol. 6 (2015).
- 1186 16. Huh, M. S. *et al.* Stalled replication forks within heterochromatin require ATRX for  
1187 protection. *Cell Death & Disease* vol. 7 e2220–e2220 (2016).
- 1188 17. Juhász, S., Elbakry, A., Mathes, A. & Löbrich, M. ATRX Promotes DNA Repair Synthesis  
1189 and Sister Chromatid Exchange during Homologous Recombination. *Mol. Cell* **71**, 11–  
1190 24.e7 (2018).
- 1191 18. Lovejoy, C. A., Takai, K., Huh, M. S., Picketts, D. J. & de Lange, T. ATRX affects the repair  
1192 of telomeric DSBs by promoting cohesion and a DAXX-dependent activity. *PLoS Biol.* **18**,  
1193 e3000594 (2020).
- 1194 19. Varshney, D., Spiegel, J., Zyner, K., Tannahill, D. & Balasubramanian, S. The regulation  
1195 and functions of DNA and RNA G-quadruplexes. *Nat. Rev. Mol. Cell Biol.* (2020)  
1196 doi:10.1038/s41580-020-0236-x.
- 1197 20. Rhodes, D. & Lipps, H. J. G-quadruplexes and their regulatory roles in biology. *Nucleic*  
1198 *Acids Res.* **43**, 8627–8637 (2015).
- 1199 21. Técher, H., Koundrioukoff, S., Nicolas, A. & Debatisse, M. The impact of replication stress  
1200 on replication dynamics and DNA damage in vertebrate cells. *Nat. Rev. Genet.* **18**, 535–  
1201 550 (2017).
- 1202 22. van Wietmarschen, N. *et al.* BLM helicase suppresses recombination at G-quadruplex

- 1203 motifs in transcribed genes. *Nat. Commun.* **9**, 271 (2018).
- 1204 23. Wu, W. *et al.* HERC2 Facilitates BLM and WRN Helicase Complex Interaction with RPA to  
1205 Suppress G-Quadruplex DNA. *Cancer Res.* **78**, 6371–6385 (2018).
- 1206 24. Pladevall-Morera, D. *et al.* Proteomic characterization of chromosomal common fragile site  
1207 (CFS)-associated proteins uncovers ATRX as a regulator of CFS stability. *Nucleic Acids*  
1208 *Res.* **47**, 8332 (2019).
- 1209 25. Wang, Y. *et al.* G-quadruplex DNA drives genomic instability and represents a targetable  
1210 molecular abnormality in ATRX-deficient malignant glioma. *Nat. Commun.* **10**, 943 (2019).
- 1211 26. Watson, L. A. *et al.* Atrx deficiency induces telomere dysfunction, endocrine defects, and  
1212 reduced life span. *J. Clin. Invest.* **123**, 2049–2063 (2013).
- 1213 27. Schmid-Burgk, J. L., Höning, K., Ebert, T. S. & Hornung, V. CRISPaint allows modular  
1214 base-specific gene tagging using a ligase-4-dependent mechanism. *Nat. Commun.* **7**,  
1215 12338 (2016).
- 1216 28. Navarro, C. & Elsasser, S. J. An embryonic stem cell-specific heterochromatin state allows  
1217 core histone exchange in the absence of DNA accessibility. *bioRxiv* (2020).
- 1218 29. Sen, D. & Gilbert, W. Formation of parallel four-stranded complexes by guanine-rich motifs  
1219 in DNA and its implications for meiosis. *Nature* **334**, 364–366 (1988).
- 1220 30. Sundquist, W. I. & Klug, A. Telomeric DNA dimerizes by formation of guanine tetrads  
1221 between hairpin loops. *Nature* **342**, 825–829 (1989).
- 1222 31. Huppert, J. L. & Balasubramanian, S. Prevalence of quadruplexes in the human genome.  
1223 *Nucleic Acids Res.* **33**, 2908–2916 (2005).
- 1224 32. Biffi, G., Tannahill, D., McCafferty, J. & Balasubramanian, S. Quantitative visualization of  
1225 DNA G-quadruplex structures in human cells. *Nat. Chem.* **5**, 182–186 (2013).
- 1226 33. Zyner, K. G. *et al.* Genetic interactions of G-quadruplexes in humans. *Elife* **8**, (2019).
- 1227 34. Bochman, M. L. & Schwacha, A. The Mcm complex: unwinding the mechanism of a  
1228 replicative helicase. *Microbiol. Mol. Biol. Rev.* **73**, 652–683 (2009).
- 1229 35. Tan, B. C.-M., Liu, H., Lin, C.-L. & Lee, S.-C. Functional cooperation between FACT and  
1230 MCM is coordinated with cell cycle and differential complex formation. *J. Biomed. Sci.* **17**,  
1231 11 (2010).
- 1232 36. Gibbons, R. J. *et al.* Mutations in transcriptional regulator ATRX establish the functional  
1233 significance of a PHD-like domain. *Nat. Genet.* **17**, 146–148 (1997).
- 1234 37. Schwartzenuber, J. *et al.* Driver mutations in histone H3.3 and chromatin remodelling  
1235 genes in paediatric glioblastoma. *Nature* **482**, 226–231 (2012).
- 1236 38. Hoelper, D., Huang, H., Jain, A. Y., Patel, D. J. & Lewis, P. W. Structural and mechanistic  
1237 insights into ATRX-dependent and -independent functions of the histone chaperone DAXX.  
1238 *Nat. Commun.* **8**, 1193 (2017).
- 1239 39. Martire, S. & Banaszynski, L. A. The roles of histone variants in fine-tuning chromatin  
1240 organization and function. *Nature Reviews Molecular Cell Biology* (2020)  
1241 doi:10.1038/s41580-020-0262-8.
- 1242 40. Huang, H. *et al.* A unique binding mode enables MCM2 to chaperone histones H3--H4 at  
1243 replication forks. *Nat. Struct. Mol. Biol.* **22**, 618 (2015).
- 1244 41. Ramachandran, S., Vogel, L., Strahl, B. D. & Dokholyan, N. V. Thermodynamic stability of  
1245 histone H3 is a necessary but not sufficient driving force for its evolutionary conservation.  
1246 *PLoS Comput. Biol.* **7**, e1001042 (2011).
- 1247 42. Alabert, C. *et al.* Nascent chromatin capture proteomics determines chromatin dynamics  
1248 during DNA replication and identifies unknown fork components. *Nat. Cell Biol.* **16**, 281–  
1249 293 (2014).
- 1250 43. Roy, S., Luzwick, J. W. & Schlacher, K. SIRF: Quantitative in situ analysis of protein  
1251 interactions at DNA replication forks. *Journal of Cell Biology* vol. 217 1553–1553 (2018).
- 1252 44. Prorok, P. *et al.* Involvement of G-quadruplex regions in mammalian replication origin  
1253 activity. *Nat. Commun.* **10**, 3274 (2019).

- 1254 45. Mitson, M., Kelley, L. A., Sternberg, M. J. E., Higgs, D. R. & Gibbons, R. J. Functional  
1255 significance of mutations in the Snf2 domain of ATRX. *Human Molecular Genetics* vol. 20  
1256 2603–2610 (2011).
- 1257 46. Liang, J. *et al.* Global changes in chromatin accessibility and transcription following ATRX  
1258 inactivation in human cancer cells. *FEBS Lett.* **594**, 67–78 (2020).
- 1259 47. Matsui, T. *et al.* Proviral silencing in embryonic stem cells requires the histone  
1260 methyltransferase ESET. *Nature* **464**, 927–931 (2010).
- 1261 48. Guiblet, W. M. *et al.* Long-read sequencing technology indicates genome-wide effects of  
1262 non-B DNA on polymerization speed and error rate. *Genome Res.* **28**, 1767–1778 (2018).
- 1263 49. Kamat, M. A., Bacolla, A., Cooper, D. N. & Chuzhanova, N. A Role for non-B DNA forming  
1264 sequences in mediating microlesions causing human inherited disease. *Hum. Mutat.* **37**,  
1265 65–73 (2016).
- 1266 50. Du, X. *et al.* Potential non-B DNA regions in the human genome are associated with higher  
1267 rates of nucleotide mutation and expression variation. *Nucleic Acids Res.* **42**, 12367–12379  
1268 (2014).
- 1269 51. Guiblet, W. M. *et al.* Non-B DNA: a major contributor to small- and large-scale variation in  
1270 nucleotide substitution frequencies across the genome. *Nucleic Acids Res.* **49**, 1497–1516  
1271 (2021).
- 1272 52. Koschmann, C. *et al.* ATRX loss promotes tumor growth and impairs nonhomologous end  
1273 joining DNA repair in glioma. *Sci. Transl. Med.* **8**, 328ra28 (2016).
- 1274 53. Eustermann, S. *et al.* Combinatorial readout of histone H3 modifications specifies  
1275 localization of ATRX to heterochromatin. *Nat. Struct. Mol. Biol.* **18**, 777–782 (2011).
- 1276 54. Iwase, S. *et al.* ATRX ADD domain links an atypical histone methylation recognition  
1277 mechanism to human mental-retardation syndrome. *Nat. Struct. Mol. Biol.* **18**, 769–776  
1278 (2011).
- 1279 55. Ha, M., Kraushaar, D. C. & Zhao, K. Genome-wide analysis of H3.3 dissociation reveals  
1280 high nucleosome turnover at distal regulatory regions of embryonic stem cells. *Epigenetics  
1281 & Chromatin* vol. 7 (2014).
- 1282 56. Deaton, A. M. *et al.* Enhancer regions show high histone H3.3 turnover that changes during  
1283 differentiation. *Elife* **5**, (2016).
- 1284 57. Schlesinger, S. *et al.* A hyperdynamic H3.3 nucleosome marks promoter regions in  
1285 pluripotent embryonic stem cells. *Nucleic Acids Research* vol. 45 12181–12194 (2017).
- 1286 58. Ahmad, K. & Henikoff, S. The Histone Variant H3.3 Marks Active Chromatin by Replication-  
1287 Independent Nucleosome Assembly. *Molecular Cell* vol. 9 1191–1200 (2002).
- 1288 59. Ray-Gallet, D. *et al.* HIRA is critical for a nucleosome assembly pathway independent of  
1289 DNA synthesis. *Mol. Cell* **9**, 1091–1100 (2002).
- 1290 60. Martire, S. *et al.* Phosphorylation of histone H3.3 at serine 31 promotes p300 activity and  
1291 enhancer acetylation. *Nat. Genet.* **51**, 941–946 (2019).
- 1292 61. Banaszynski, L. A. *et al.* Hira-dependent histone H3.3 deposition facilitates PRC2  
1293 recruitment at developmental loci in ES cells. *Cell* **155**, 107–120 (2013).
- 1294 62. Ballabeni, A. *et al.* Cell cycle adaptations of embryonic stem cells. *Proc. Natl. Acad. Sci. U.  
1295 S. A.* **108**, 19252–19257 (2011).
- 1296 63. Truch, J., Telenius, J., Higgs, D. R. & Gibbons, R. J. How to Tackle Challenging ChIP-Seq,  
1297 with Long-Range Cross-Linking, Using ATRX as an Example. *Methods Mol. Biol.* **1832**,  
1298 105–130 (2018).
- 1299 64. Buenostro, J. D., Giresi, P. G., Zaba, L. C., Chang, H. Y. & Greenleaf, W. J. Transposition  
1300 of native chromatin for fast and sensitive epigenomic profiling of open chromatin, DNA-  
1301 binding proteins and nucleosome position. *Nat. Methods* **10**, 1213–1218 (2013).
- 1302 65. Kaya-Okur, H. S. *et al.* CUT&Tag for efficient epigenomic profiling of small samples and  
1303 single cells. *Nat. Commun.* **10**, 1930 (2019).
- 1304 66. Henikoff, S., Henikoff, J. G., Kaya-Okur, H. S. & Ahmad, K. Efficient chromatin accessibility

- 1305 mapping in situ by nucleosome-tethered tagmentation. *Elife* **9**, e63274 (2020).  
1306 67. Marsico, G. *et al.* Whole genome experimental maps of DNA G-quadruplexes in multiple  
1307 species. *Nucleic Acids Res.* **47**, 3862–3874 (2019).  
1308 68. Zhang, J. *et al.* The International Cancer Genome Consortium Data Portal. *Nat. Biotechnol.*  
1309 **37**, 367–369 (2019).  
1310 69. Wu, K. *et al.* SETDB1-Mediated Cell Fate Transition between 2C-Like and Pluripotent  
1311 States. *Cell Rep.* **30**, 25–36.e6 (2020).  
1312 70. Elsässer, S. J., Noh, K.-M., Diaz, N., Allis, C. D. & Banaszynski, L. A. Elsässer *et al.* reply.  
1313 *Nature* **548**, E7–E9 (2017).  
1314 71. Prorok, P. *et al.* Involvement of G-quadruplex regions in mammalian replication origin  
1315 activity. *Nature Communications* vol. 10 (2019).  
1316 72. ICGC/TCGA Pan-Cancer Analysis of Whole Genomes Consortium. Pan-cancer analysis of  
1317 whole genomes. *Nature* **578**, 82–93 (2020).  
1318 73. Macheret, M. & Halazonetis, T. D. Monitoring early S-phase origin firing and replication fork  
1319 movement by sequencing nascent DNA from synchronized cells. *Nat. Protoc.* **14**, 51–67  
1320 (2019).  
1321
